# Supplementary material for: Integrating genetics with newborn metabolomics in infantile hypertrophic pyloric stenosis
Source: PubMed Central journal article supplement (PMC7794101; doi:10.1007/s11306-020-01763-2), 2021-01-08

Supplemental  
Figure 1

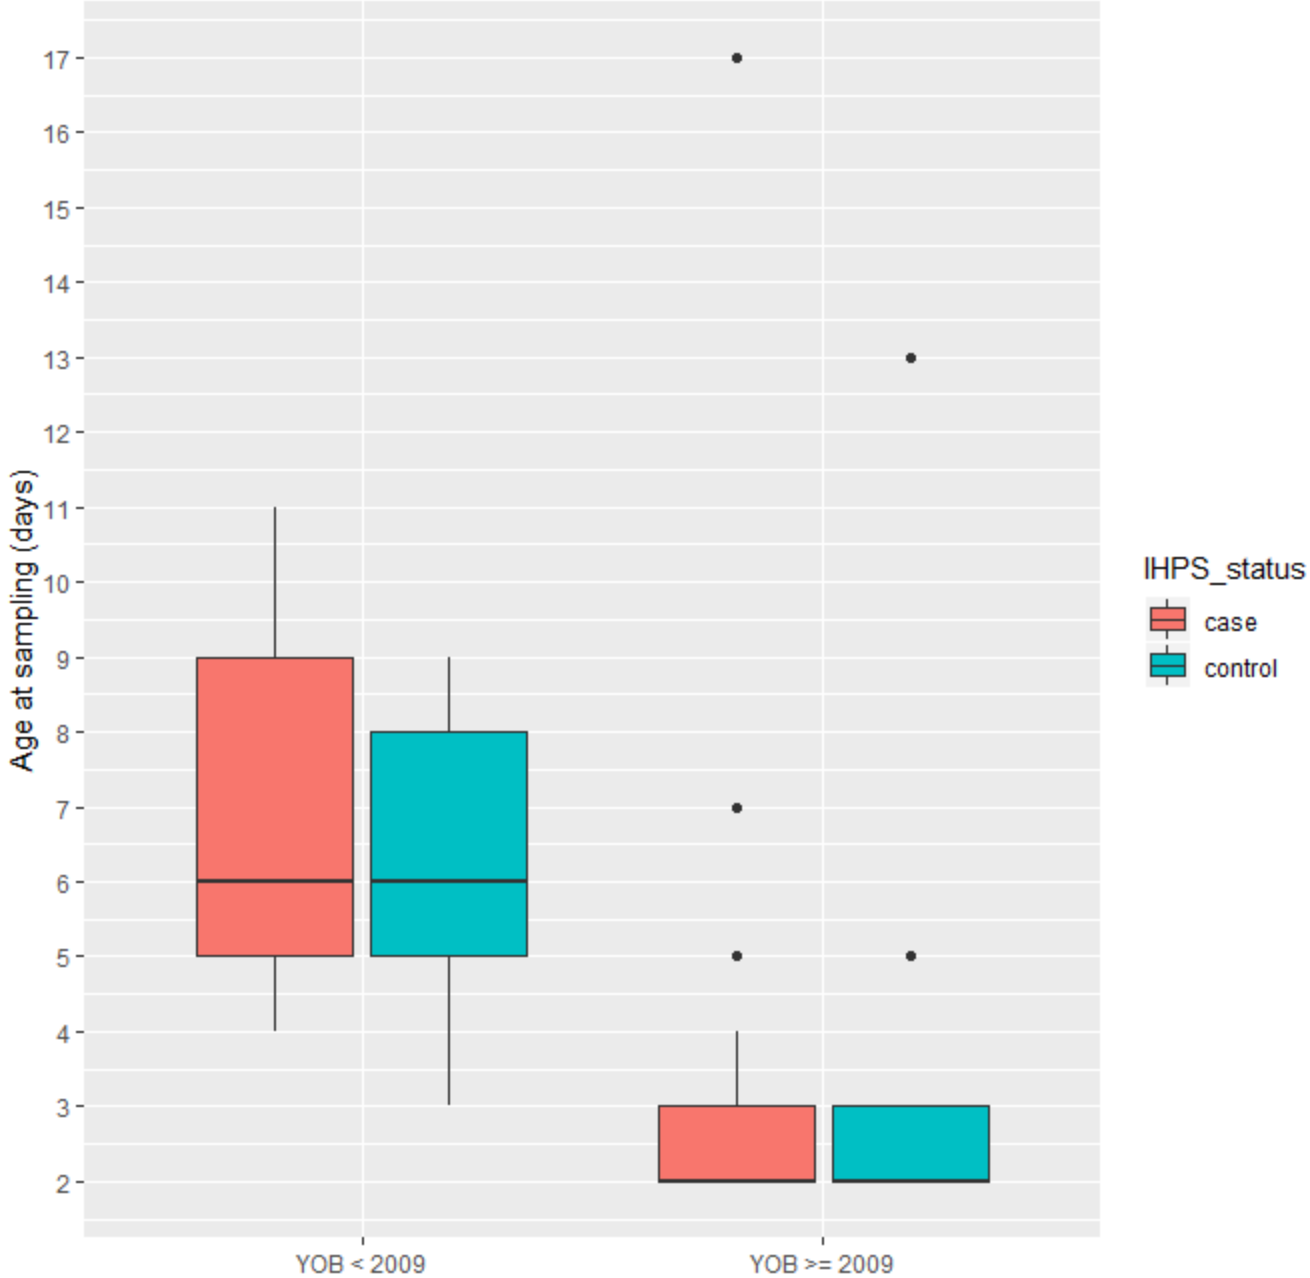

Supplemental  
Figure 2

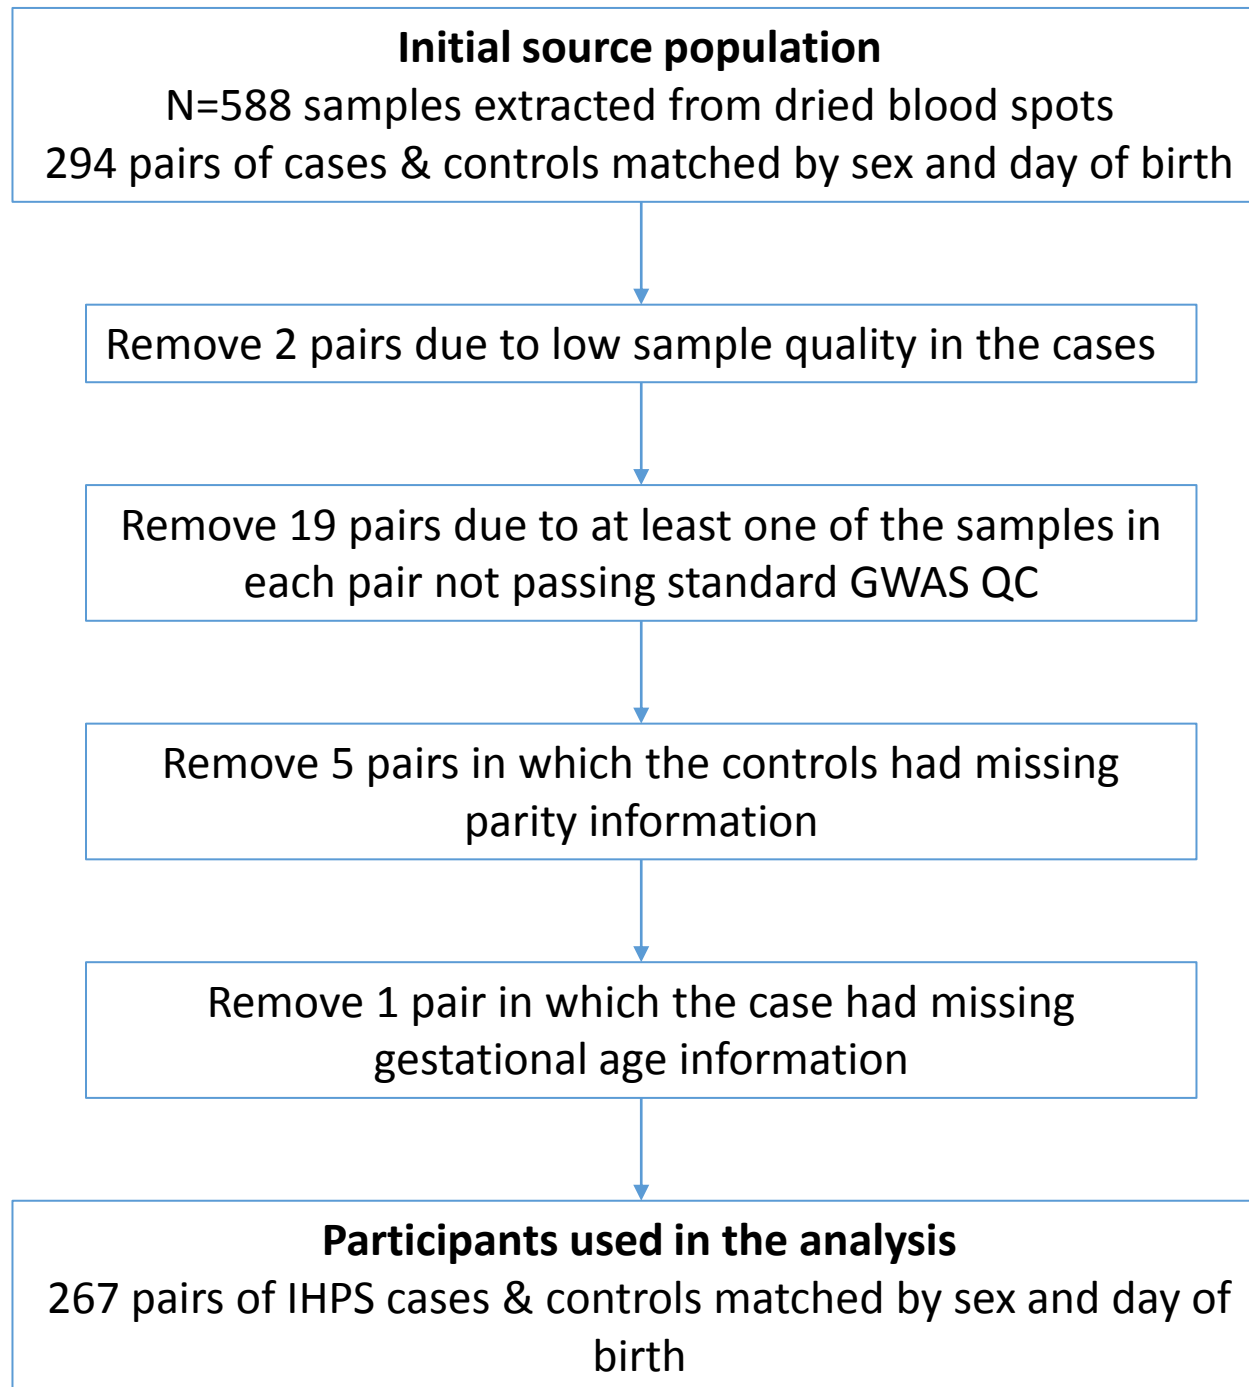

Supplemental  
Figure 3

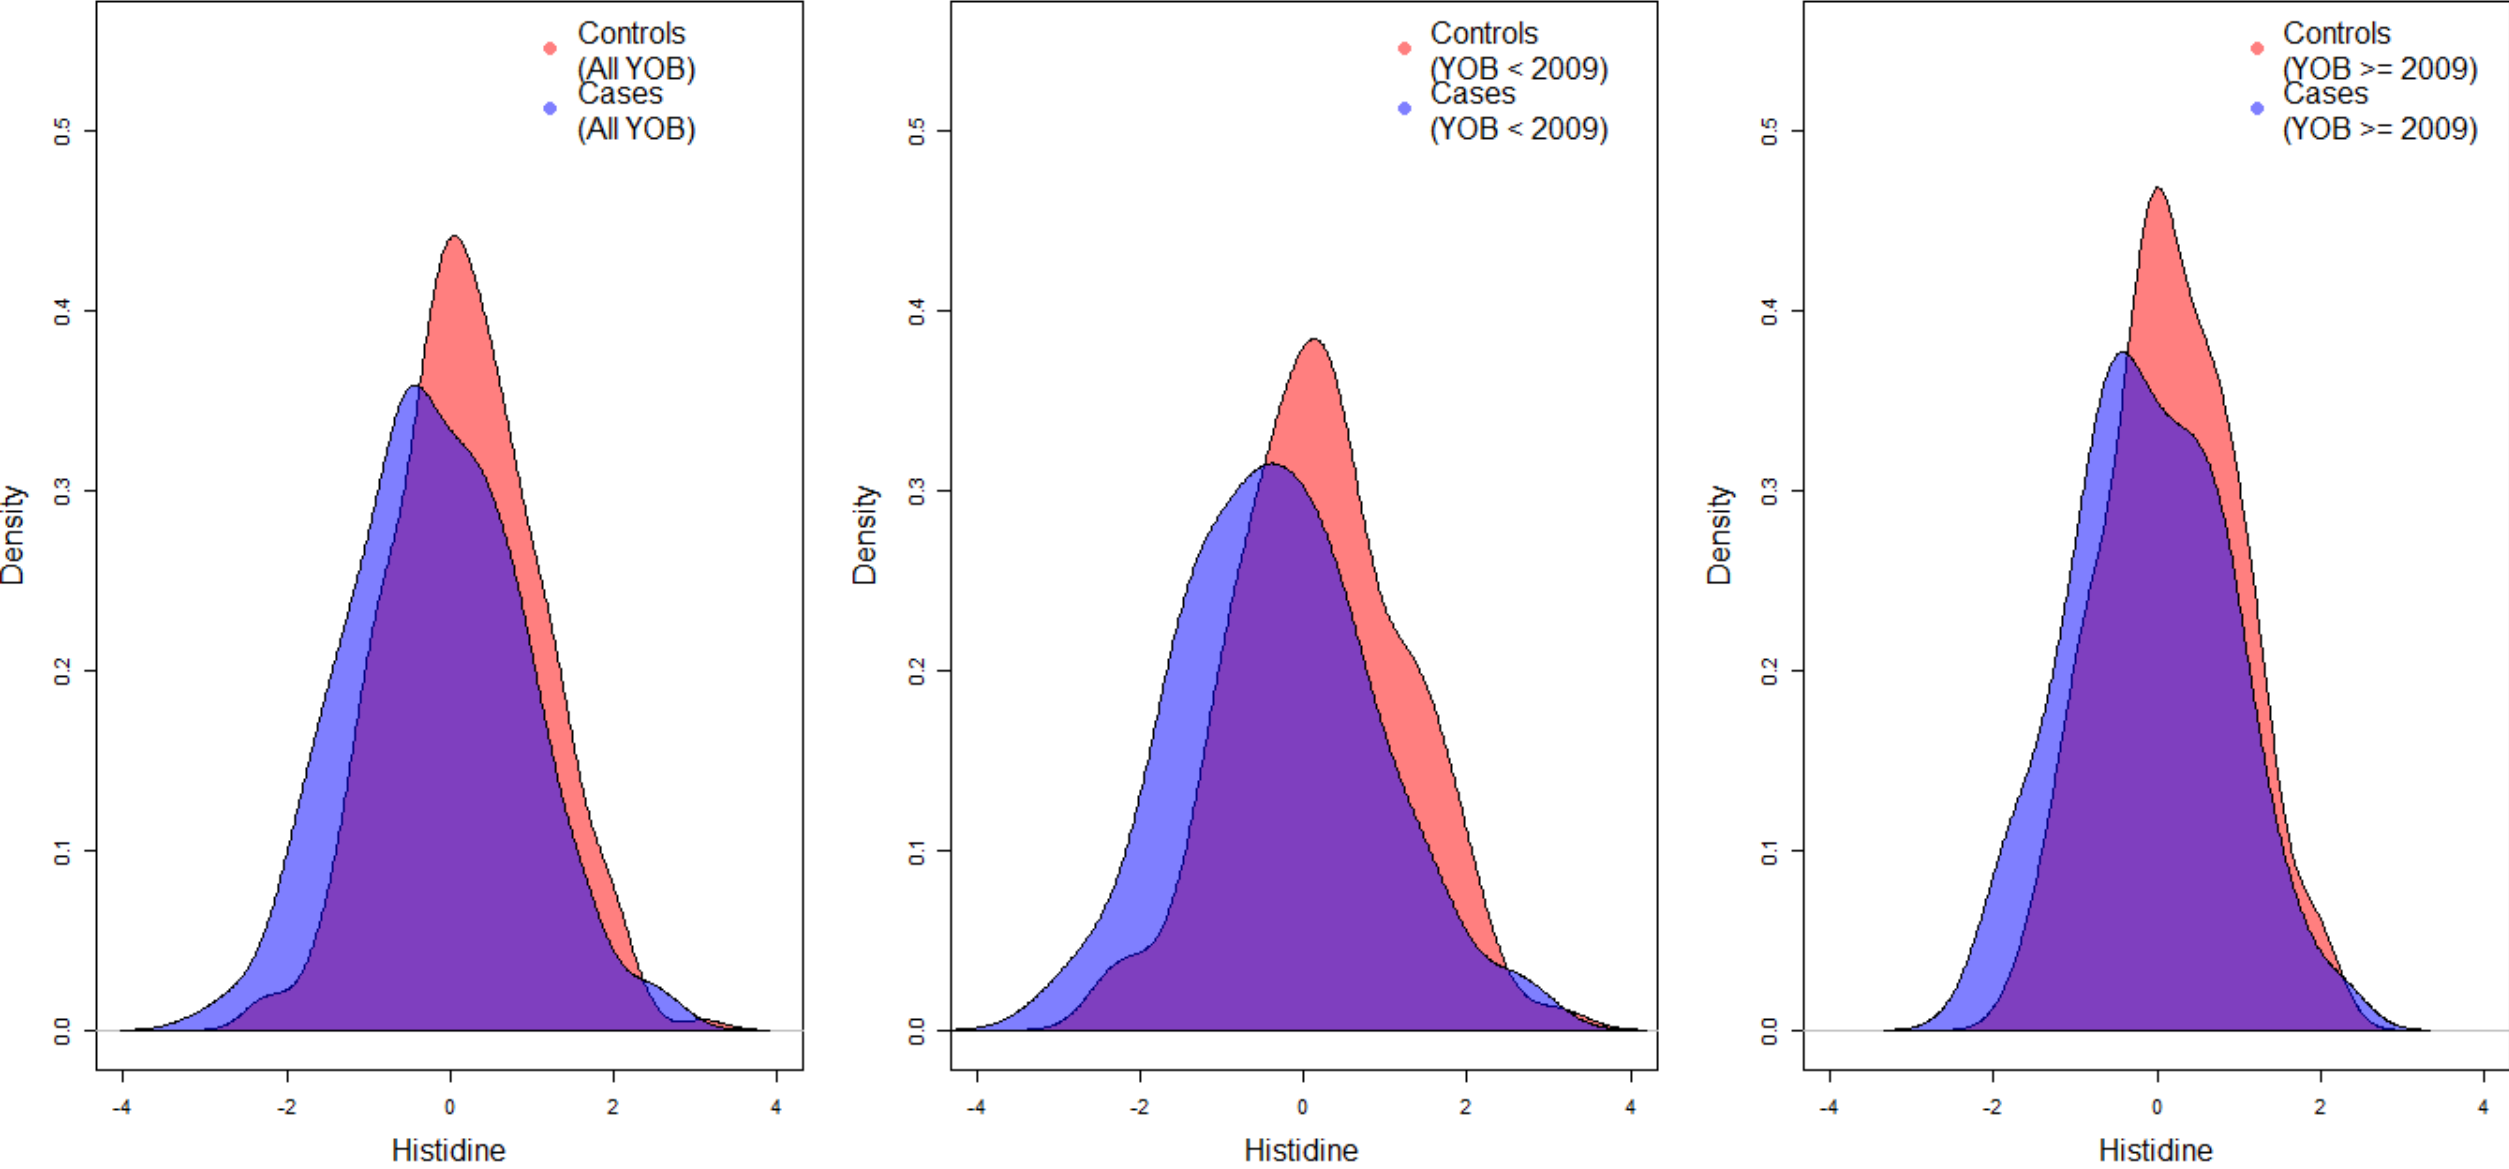

Supplemental  
Figure 4

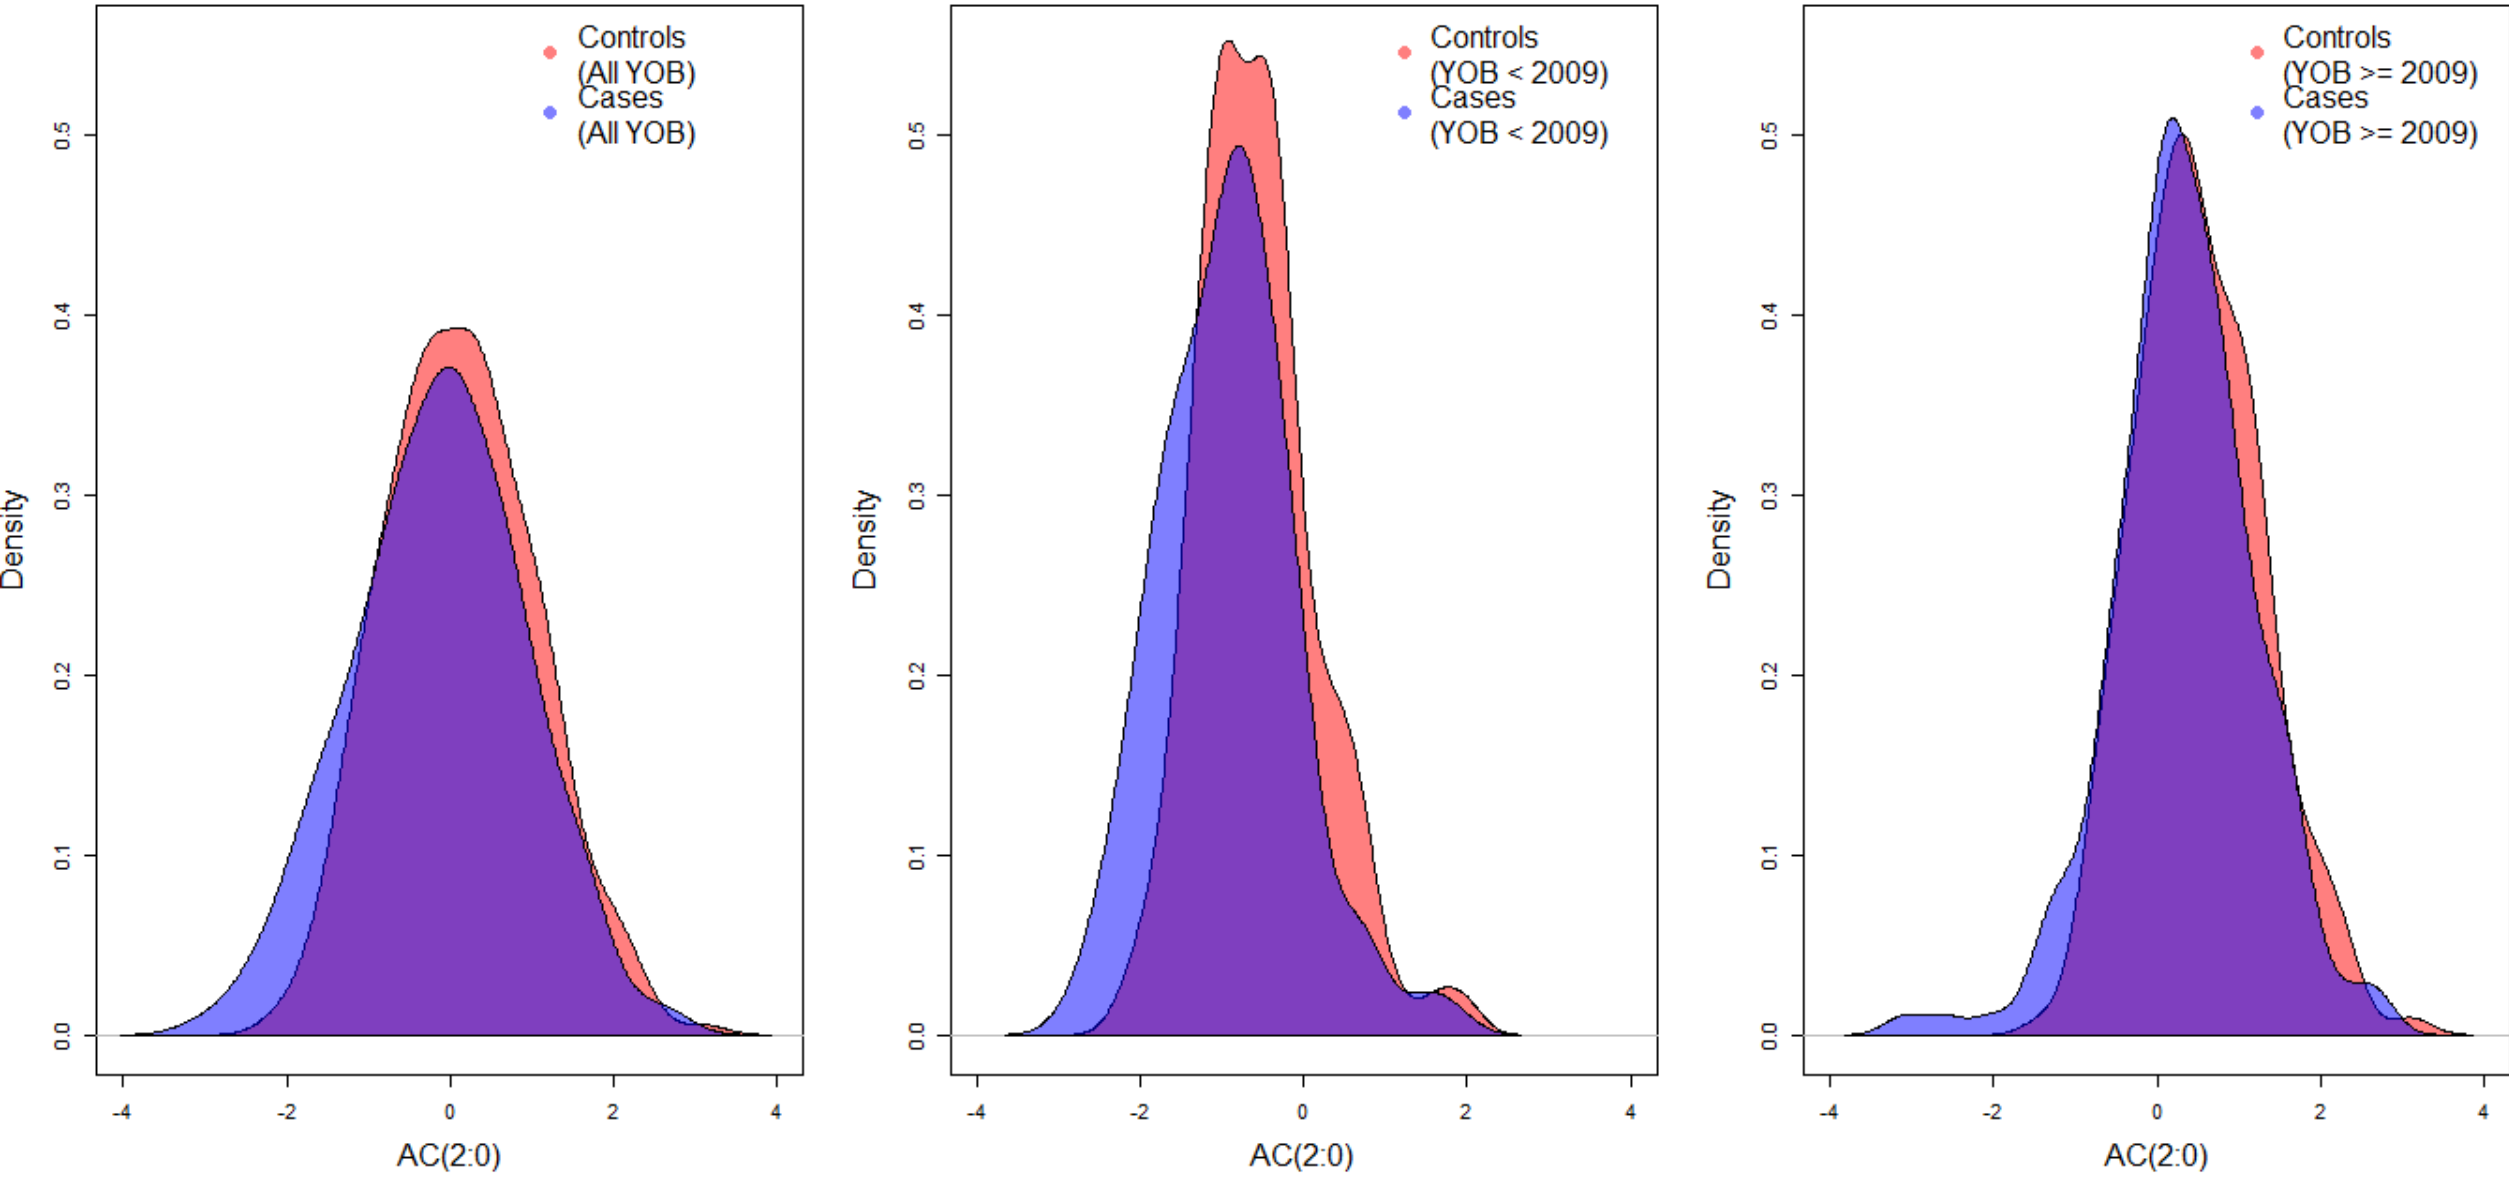

Supplemental  
Figure 5

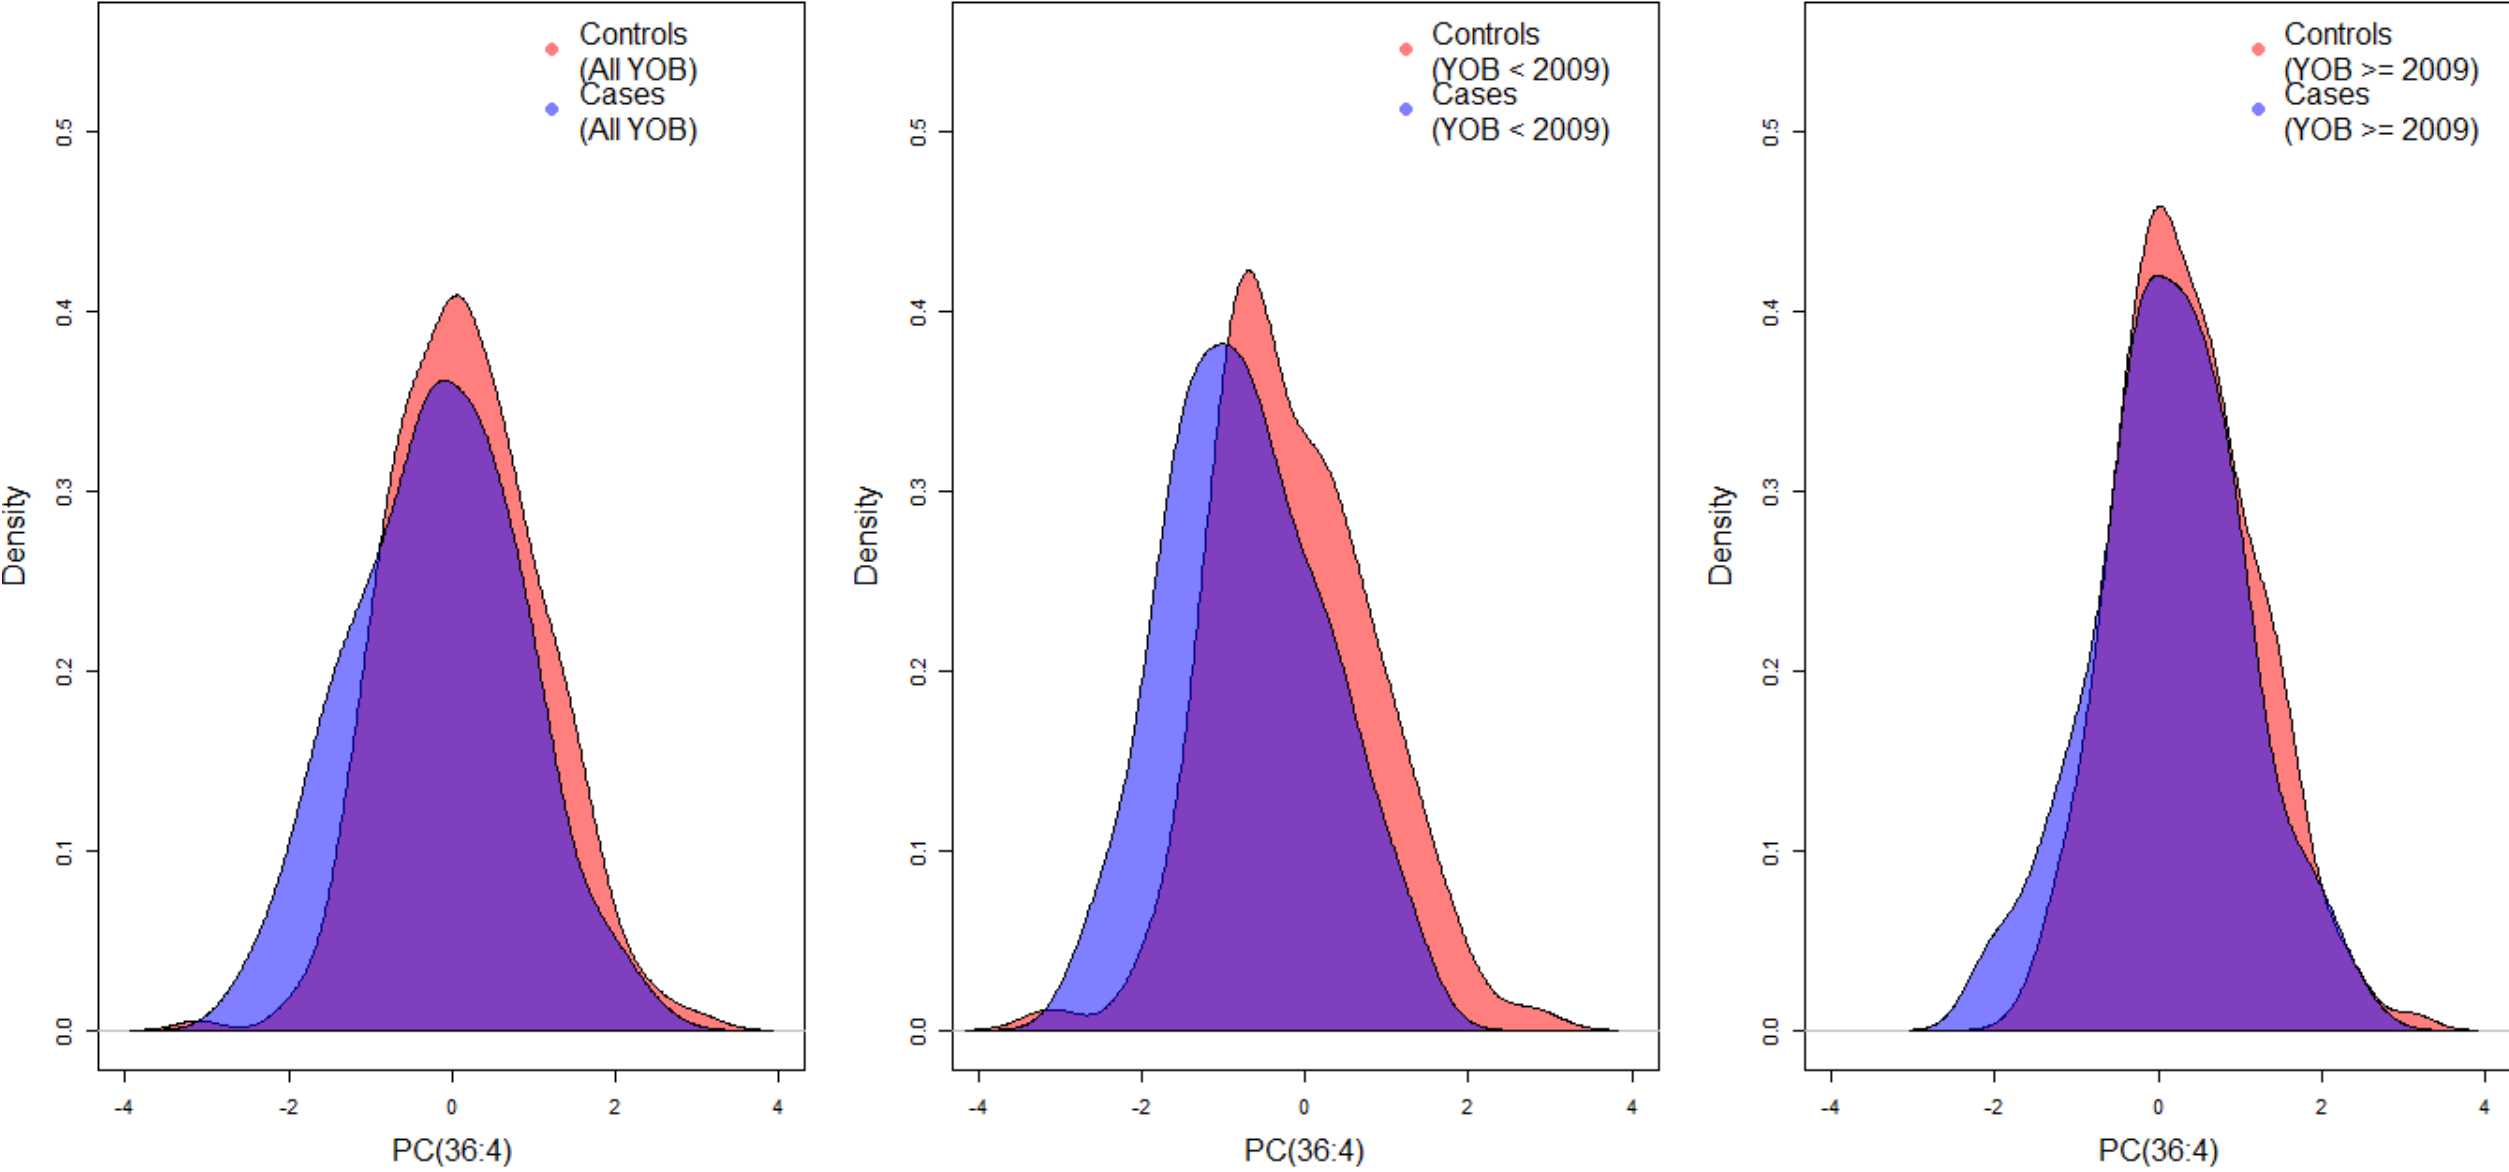

Supplemental  
Figure 6

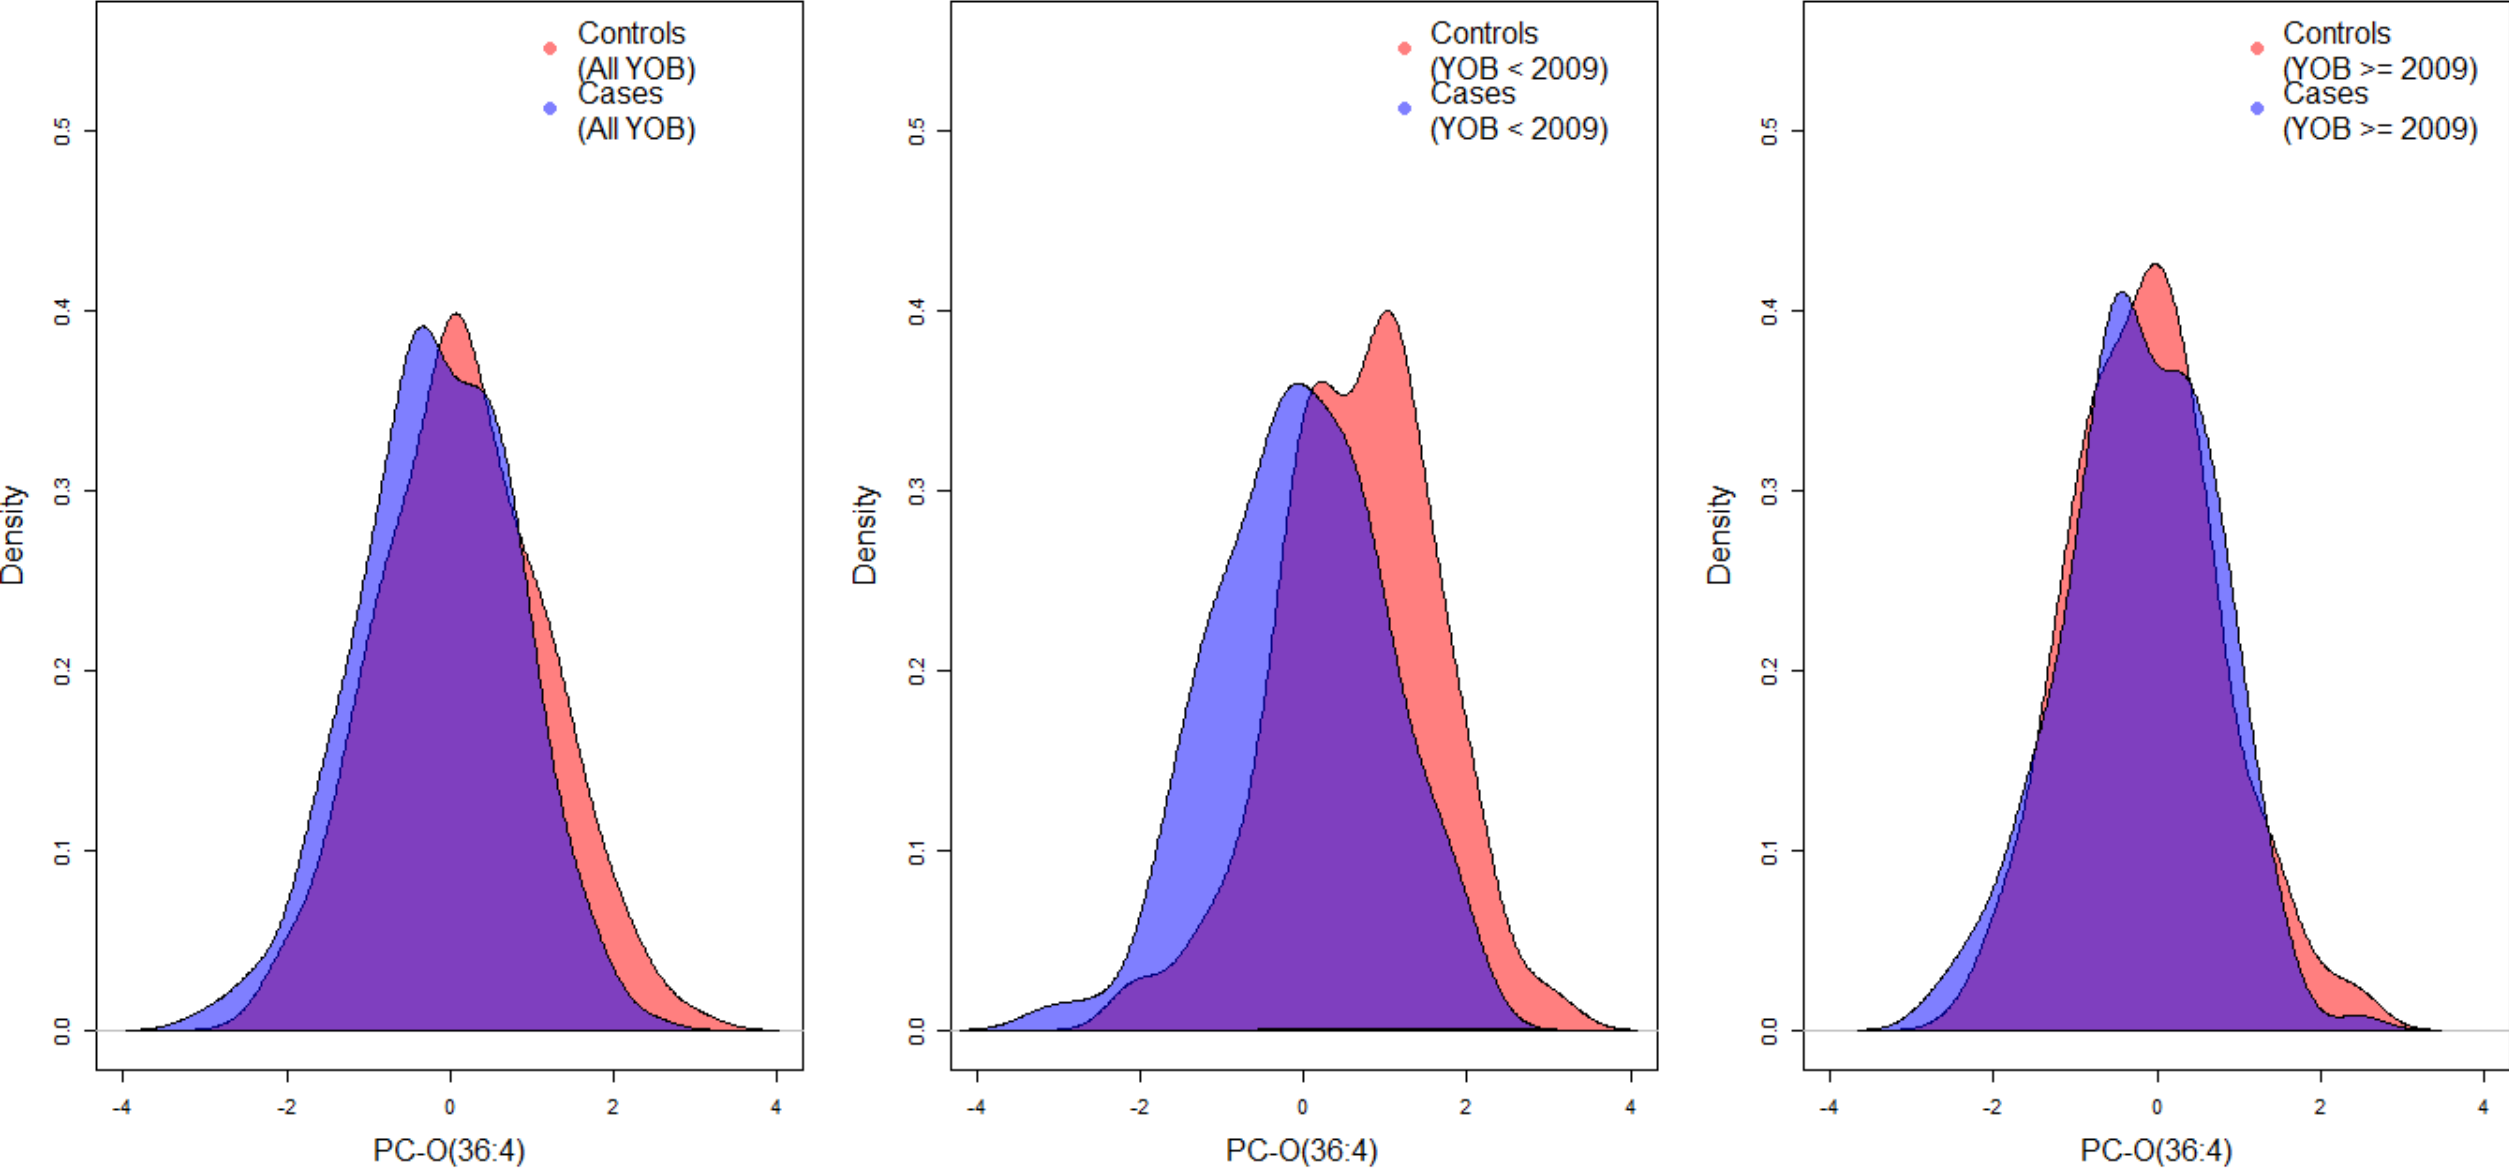

Supplemental  
Figure 7

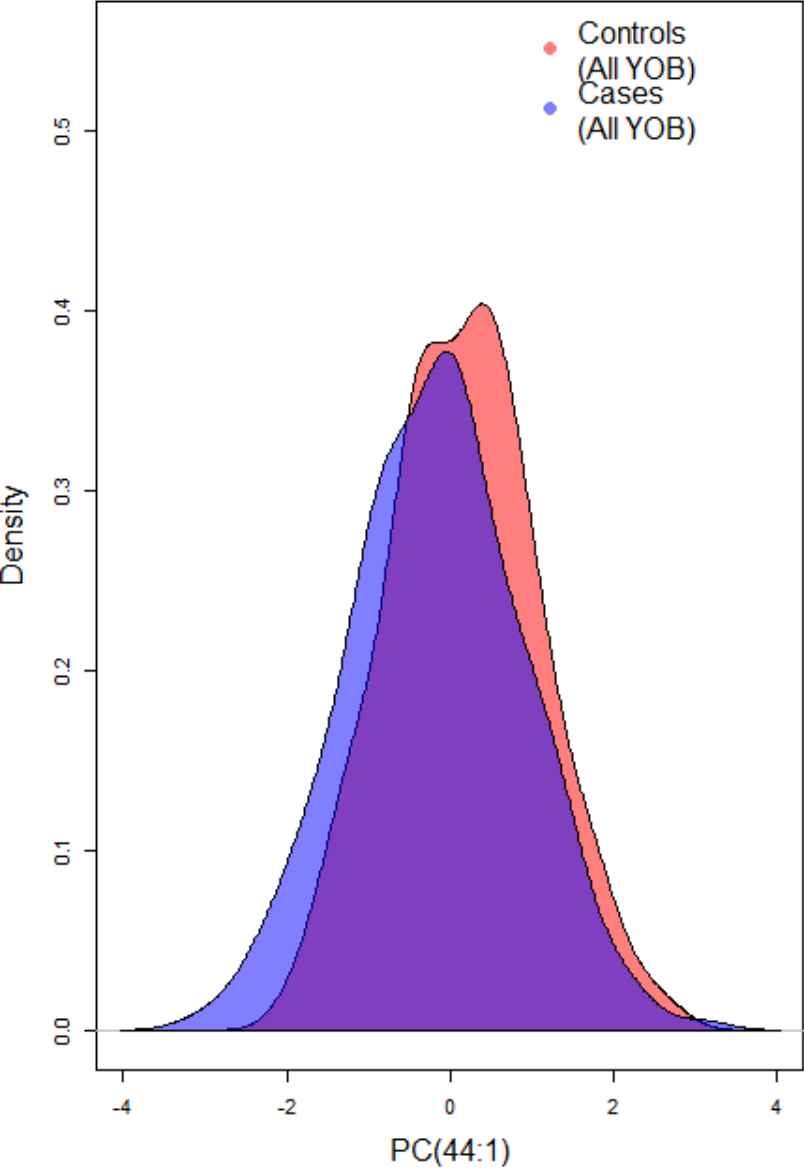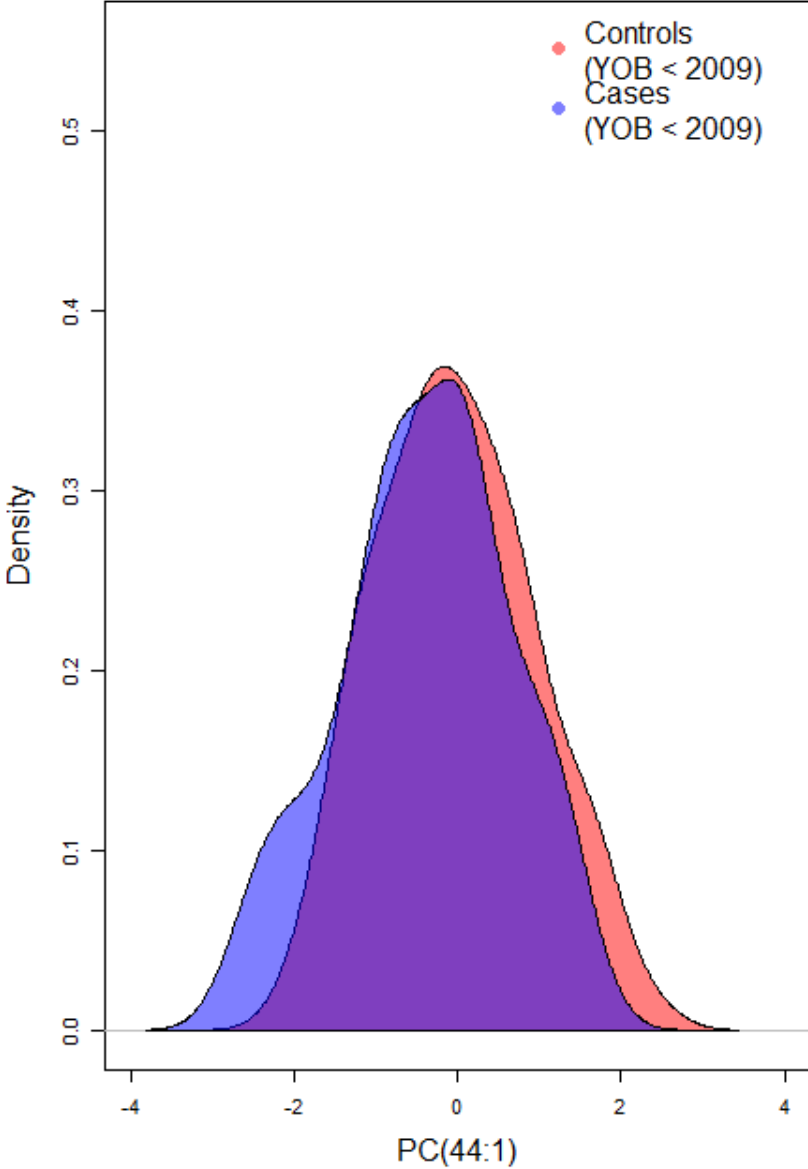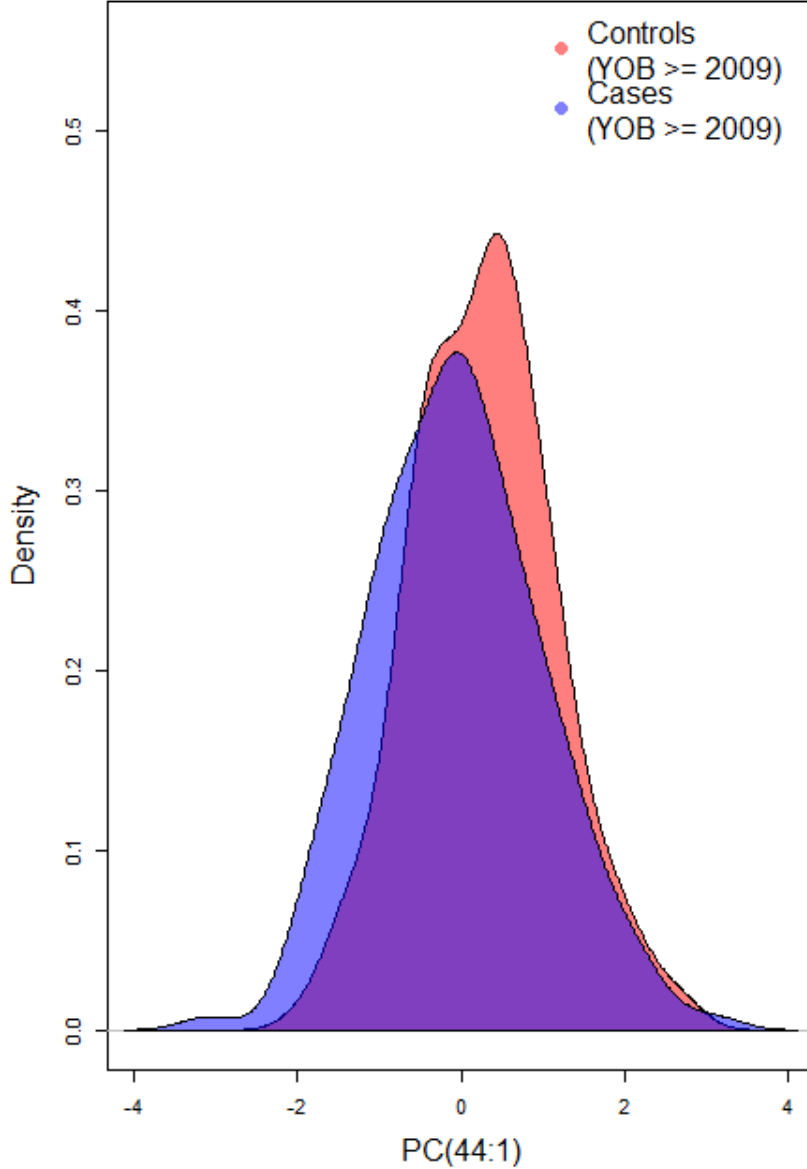

Supplemental  
Figure 8

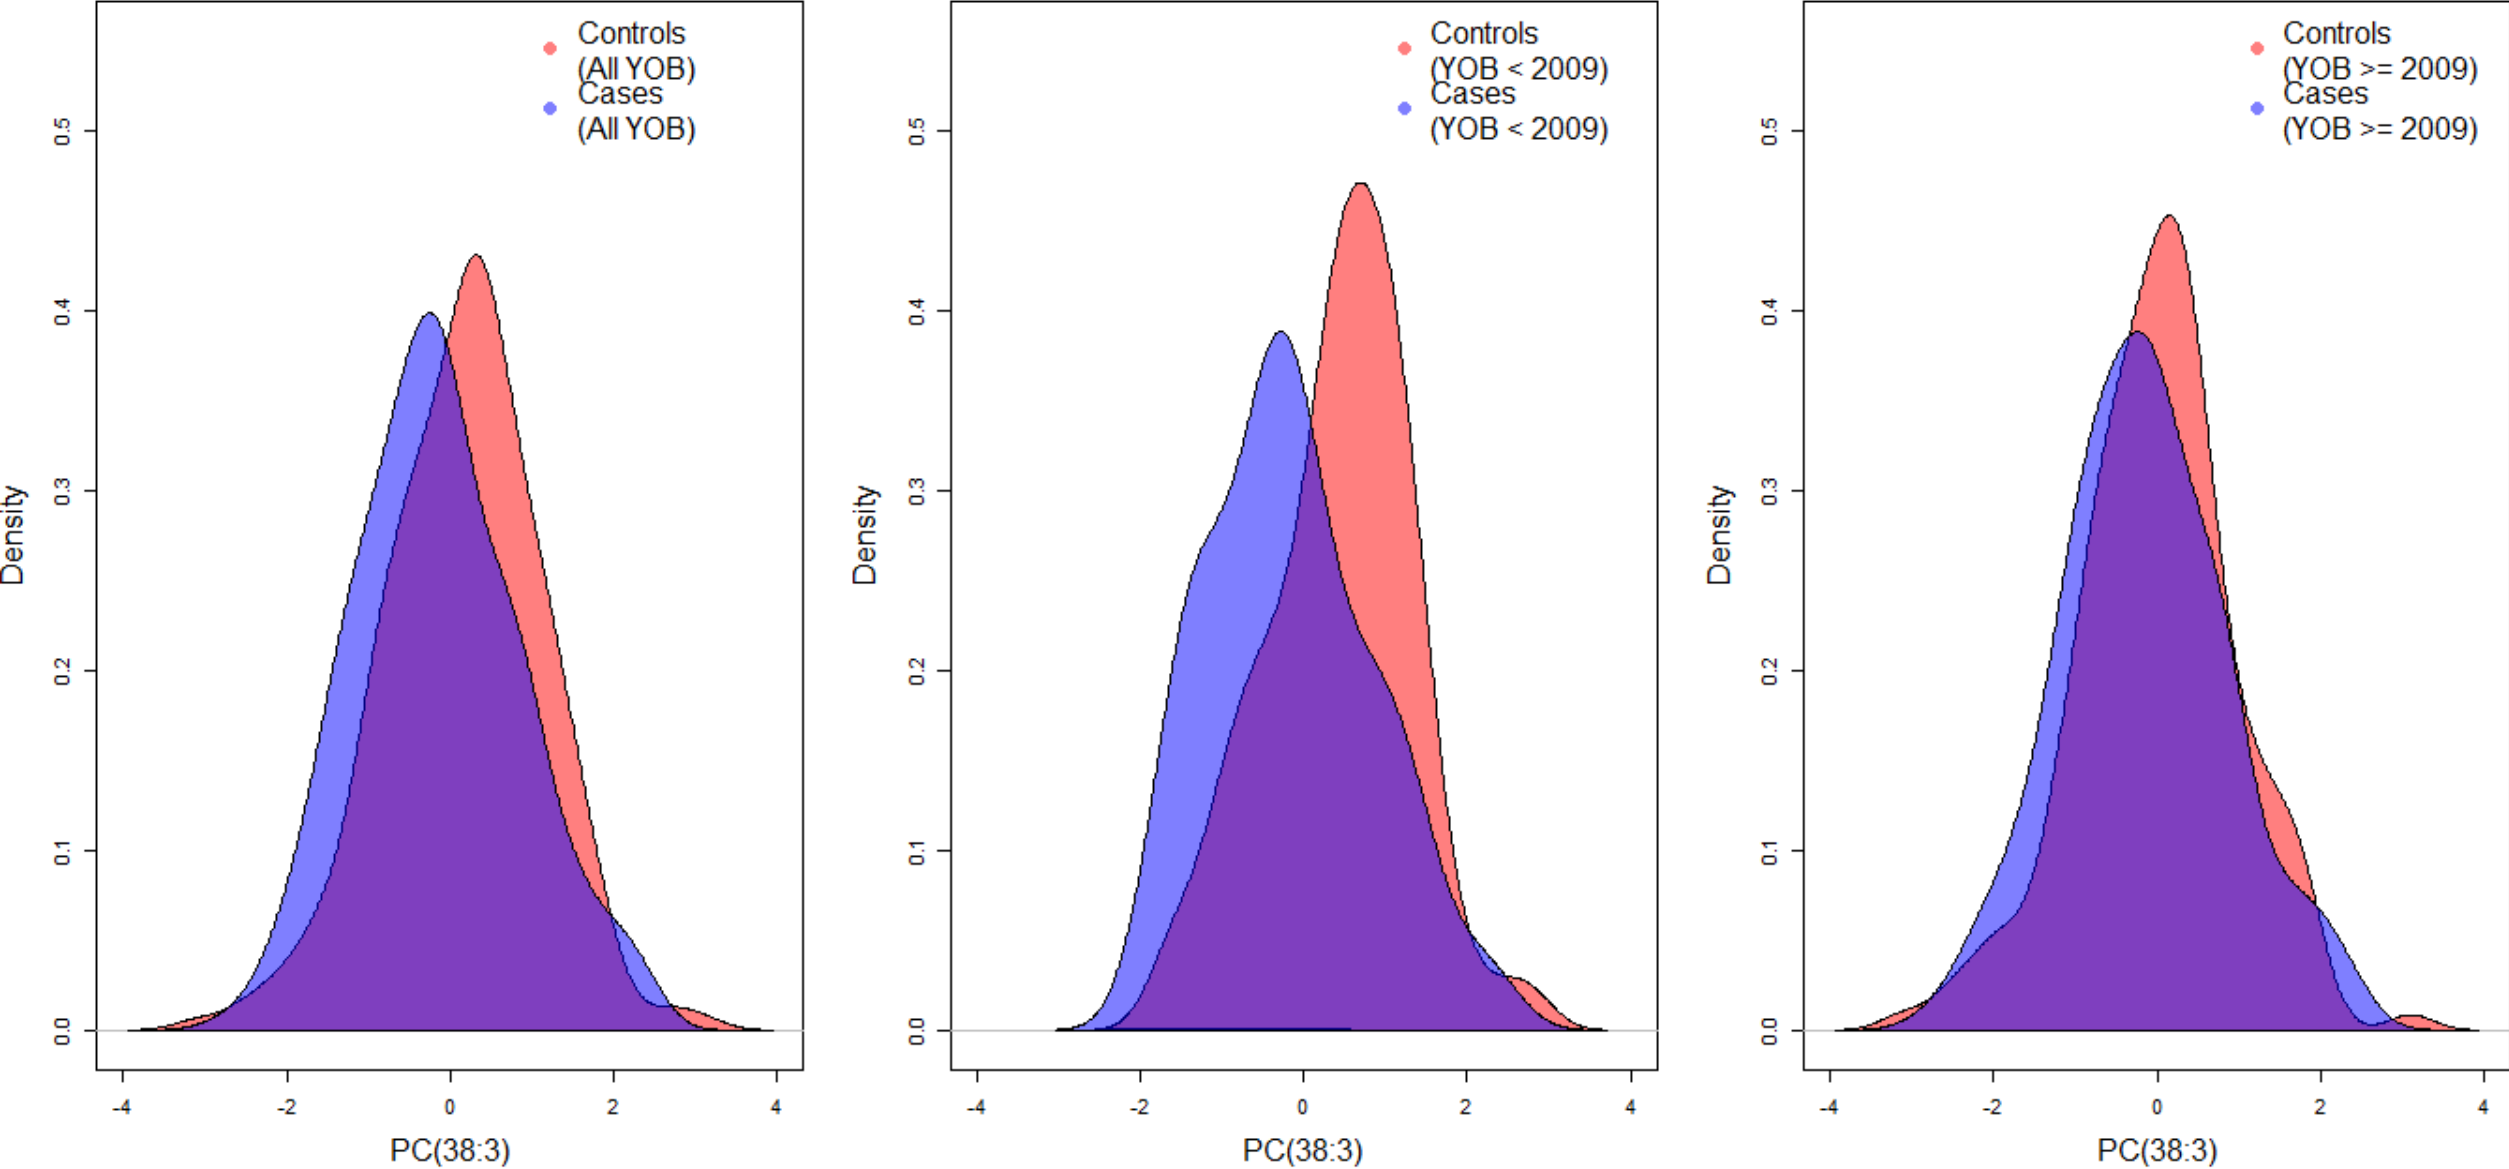



Supplemental  
Figure 9

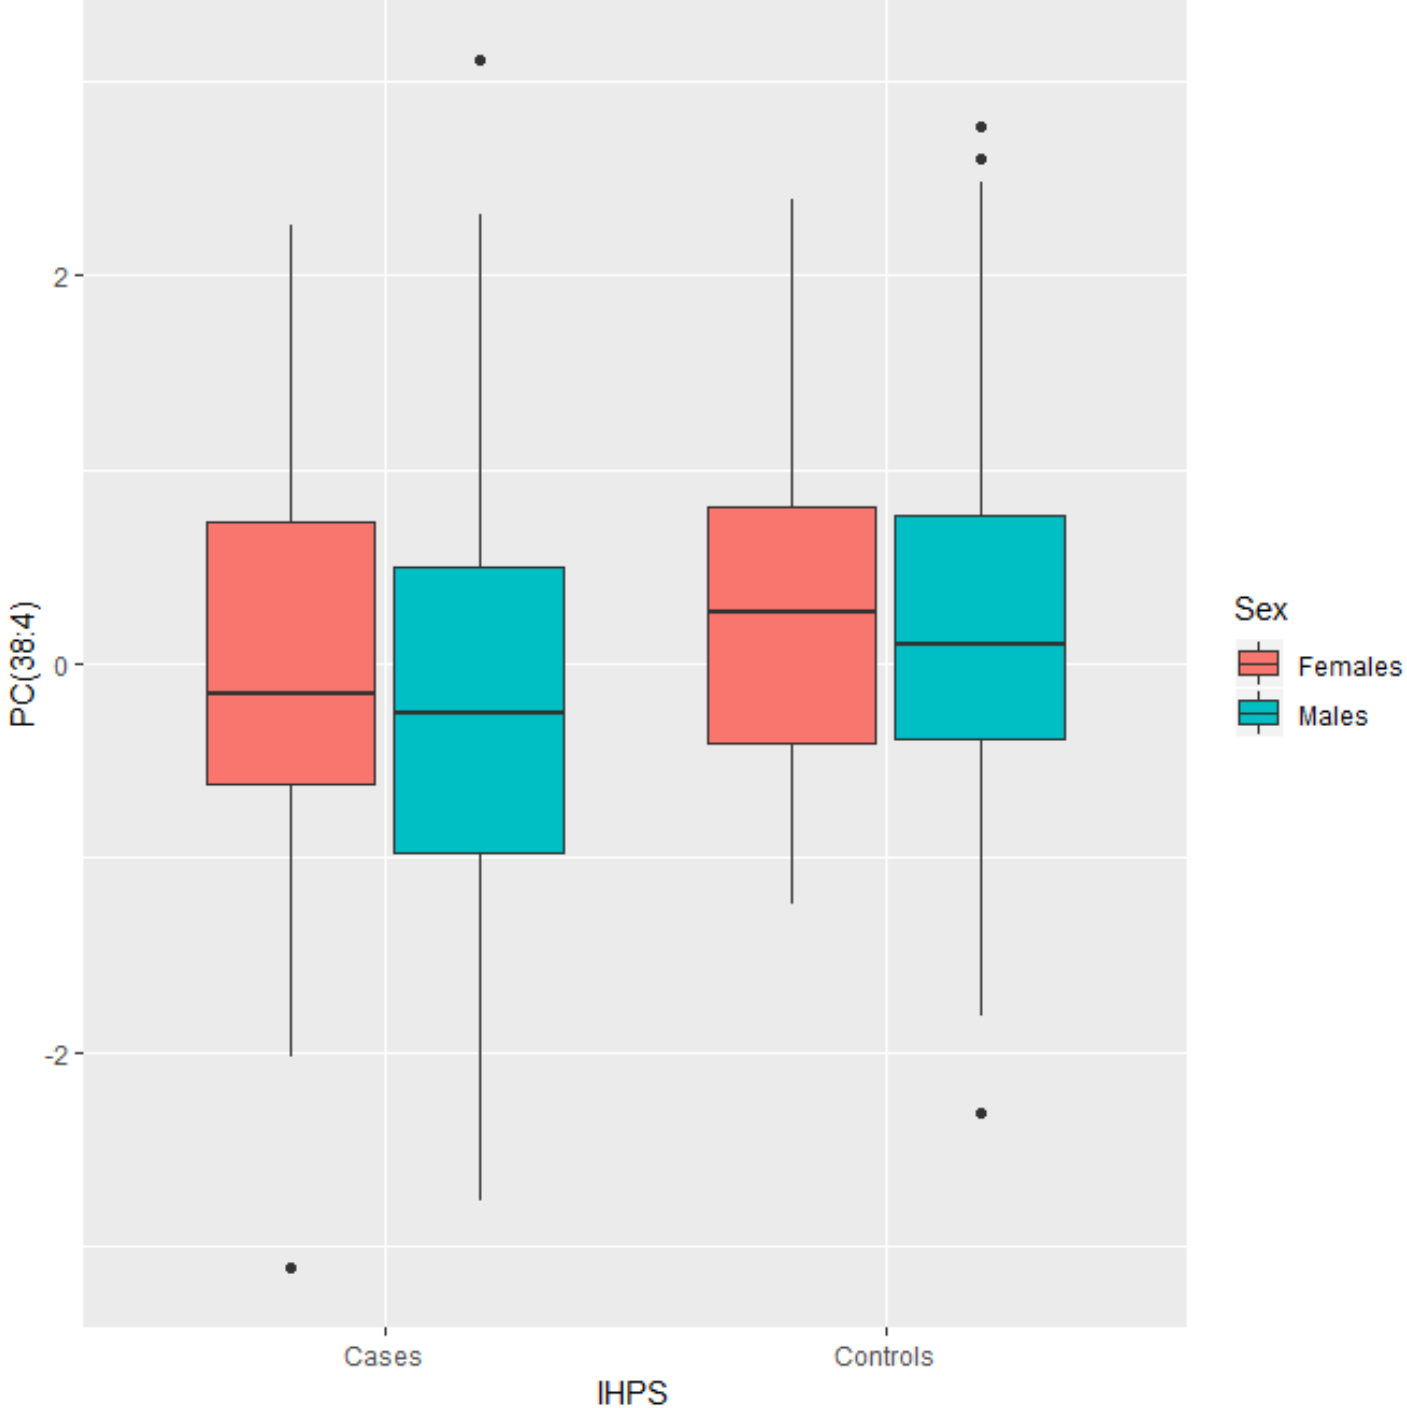

Supplemental  
Figure 10

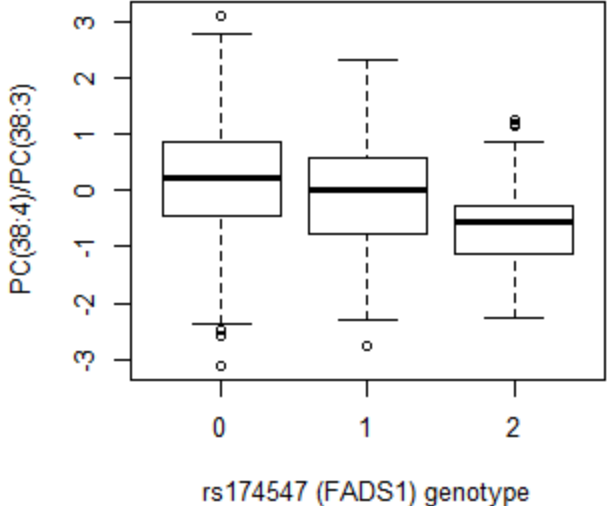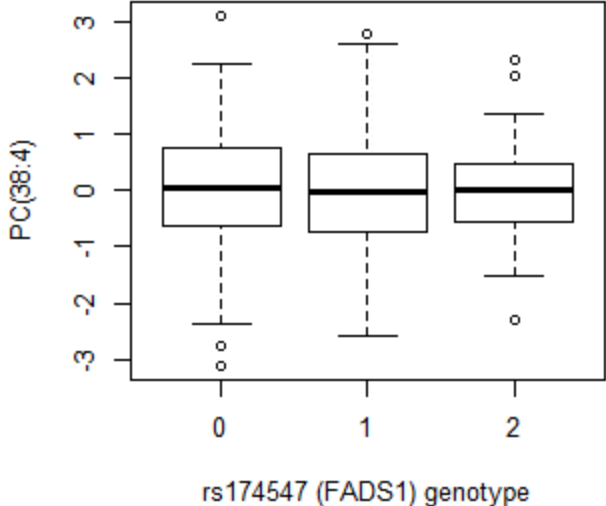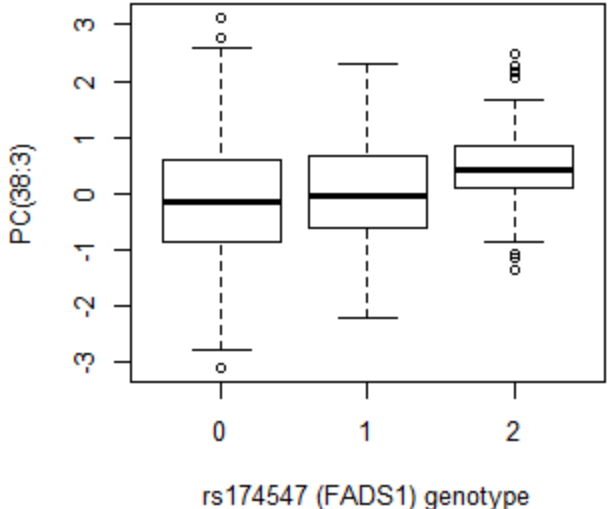

Supplemental  
Figure 11

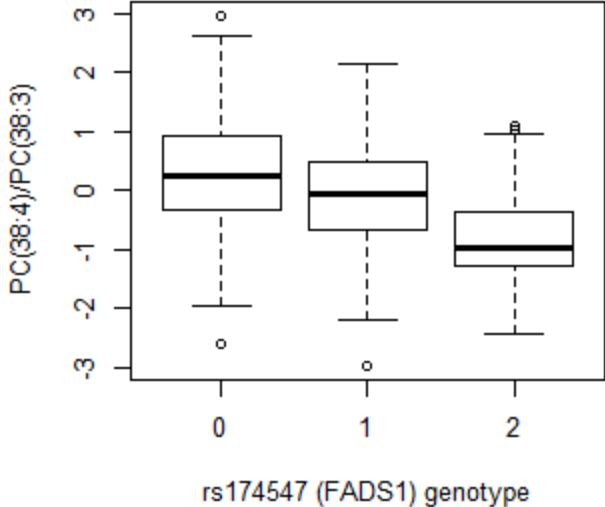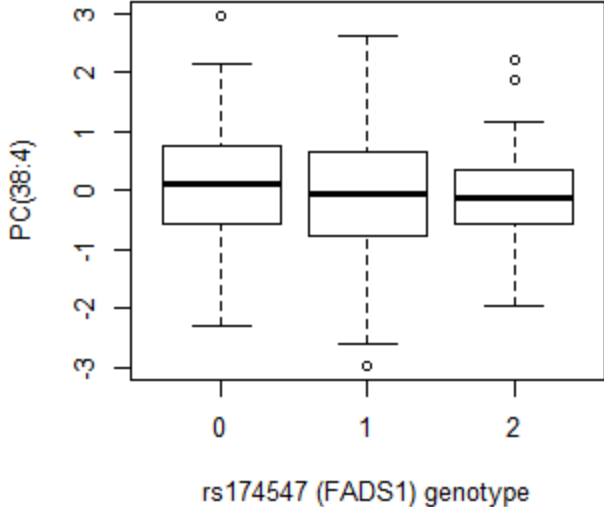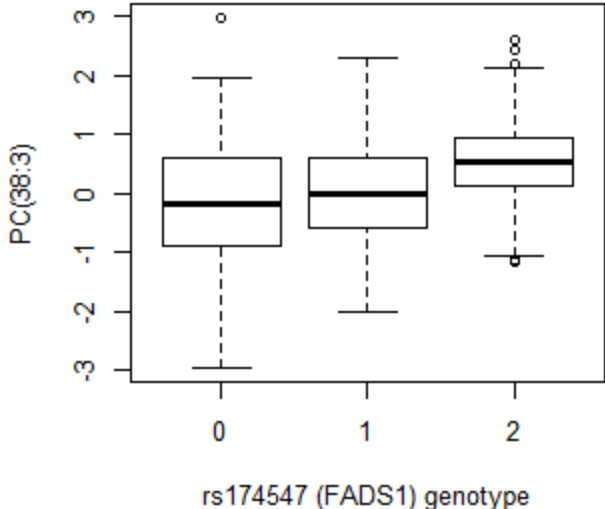

Supplemental  
Figure 12

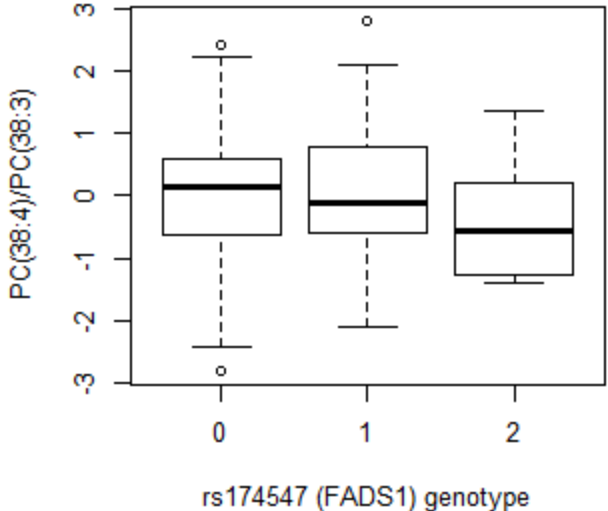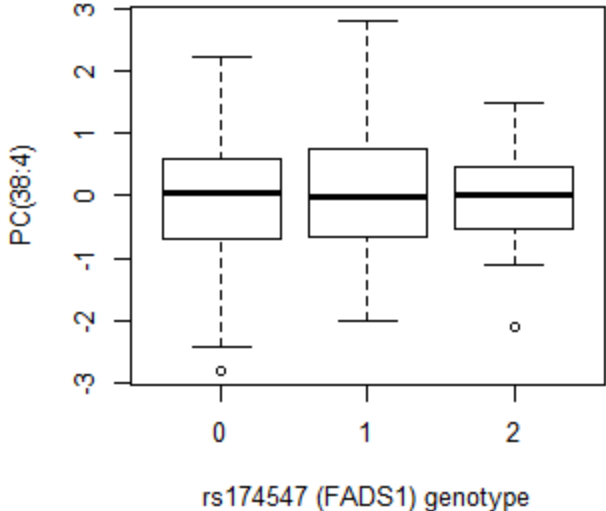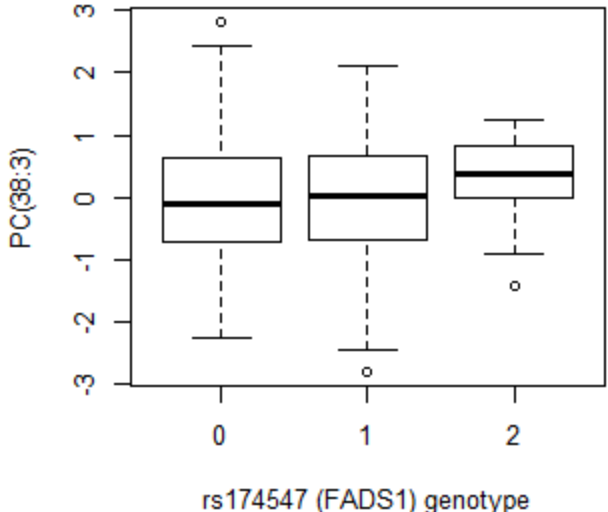

Supplemental  
Figure 13

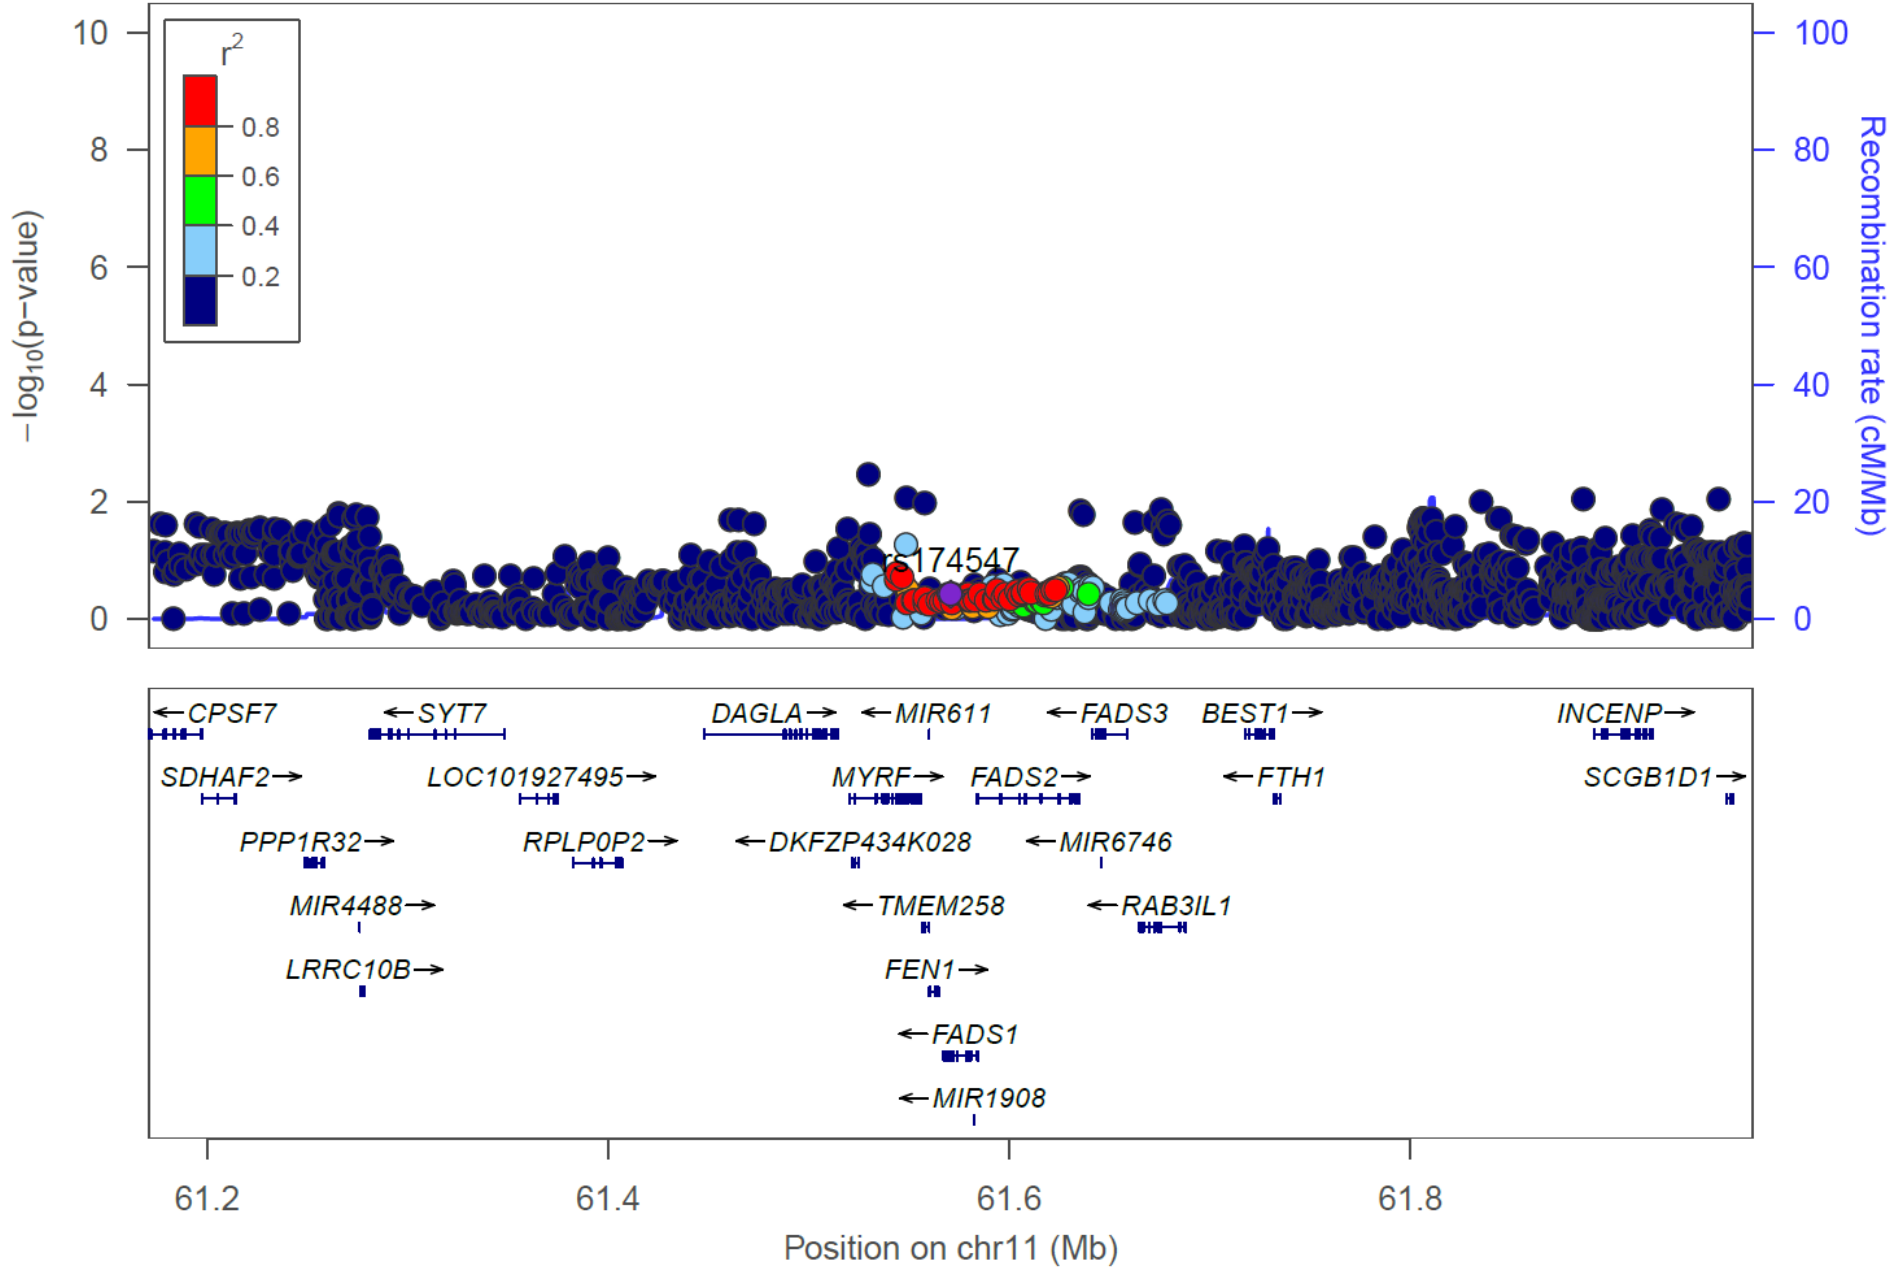

Supplemental  
Figure 14

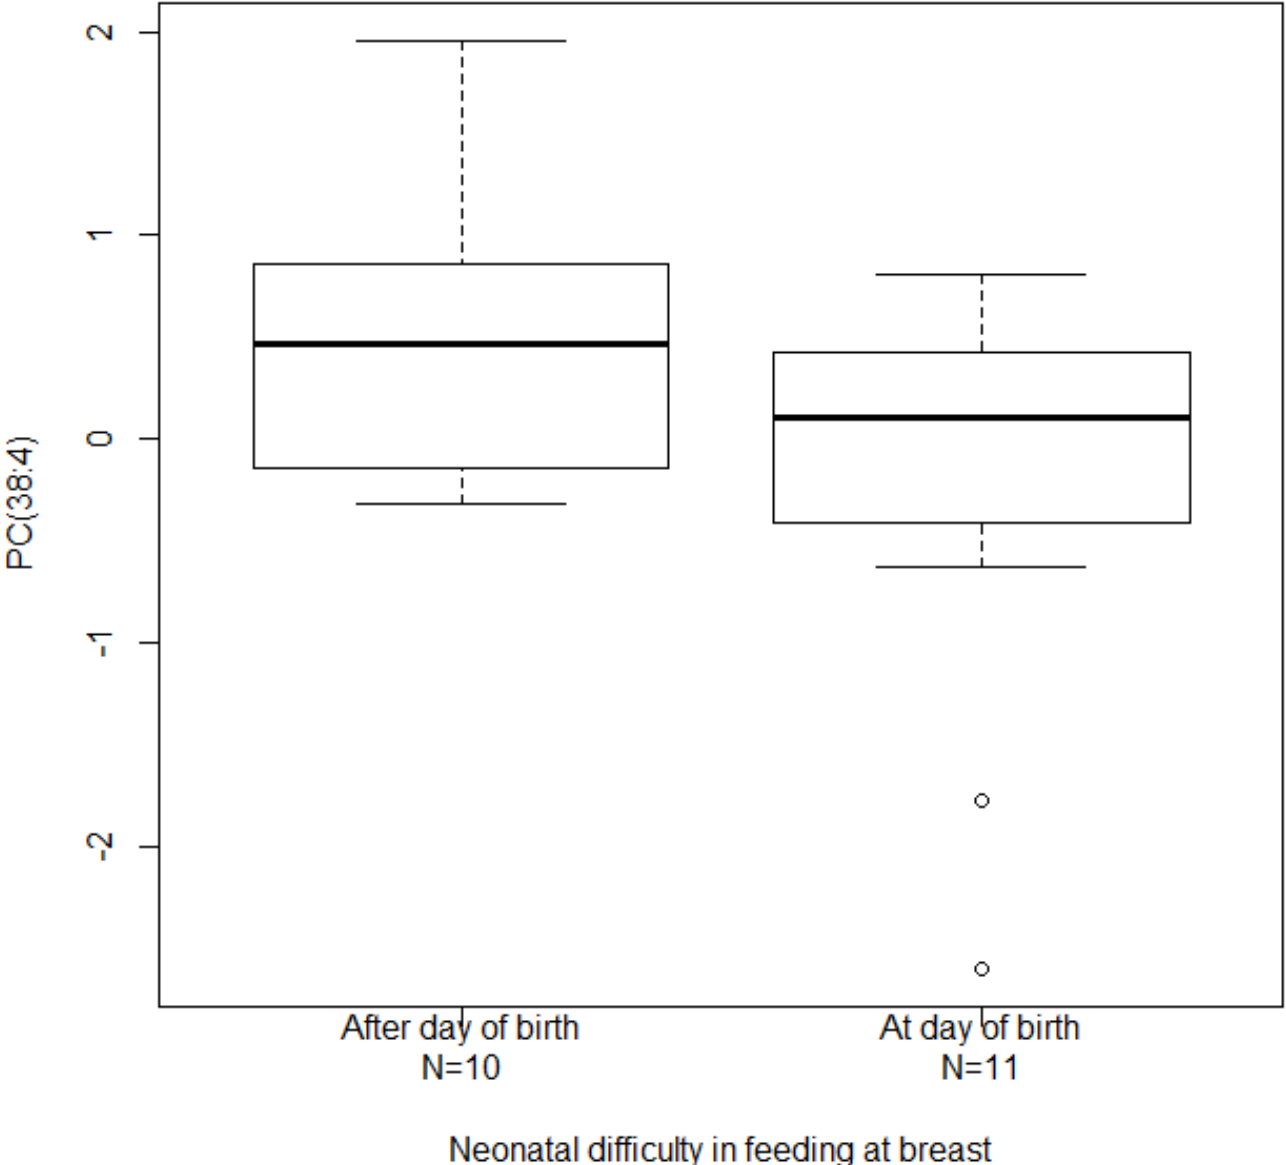

Supplement: 11306_2020_1763_MOESM2_ESM.pdf [file 11306_2020_1763_MOESM2_ESM.pdf]
