# Supplementary material for: Integrating genetics with newborn metabolomics in infantile hypertrophic pyloric stenosis
Source: PubMed Central journal article supplement (PMC7794101; doi:10.1007/s11306-020-01763-2), 2021-01-08
Supplement: 11306_2020_1763_MOESM3_ESM.pdf [file 11306_2020_1763_MOESM3_ESM.pdf]

| Metabolites | Beta         | SE          | P           |
|-------------|--------------|-------------|-------------|
| PC(38:4)    | -0.417447983 | 0.074212694 | 4.68E-08    |
| PC(36:4)    | -0.360019109 | 0.074829121 | 2.51E-06    |
| PC-O(36:4)  | -0.334980458 | 0.070485813 | 3.29E-06    |
| PC(44:1)    | -0.332726399 | 0.076490282 | 1.94E-05    |
| His         | -0.340474498 | 0.078402335 | 2.01E-05    |
| PC(38:3)    | -0.317460362 | 0.078842043 | 7.39E-05    |
| AC(2:0)     | -0.251389576 | 0.067899453 | 0.000259628 |
| TG(54:5)    | -0.30024107  | 0.082775431 | 0.000343273 |
| PC(40:6)    | -0.244357109 | 0.067957147 | 0.000385383 |
| LPC-O(18:1) | 0.247402694  | 0.069332971 | 0.000426543 |
| PC-O(40:5)  | -0.253568131 | 0.072482487 | 0.000549785 |
| SM(43:1)    | -0.256410325 | 0.076252749 | 0.000885216 |
| PC(35:1)    | -0.228999476 | 0.069388771 | 0.001099162 |
| TG(44:2)    | -0.245899186 | 0.075540733 | 0.001280257 |
| DG(34:1)    | -0.25095923  | 0.079243678 | 0.00172016  |
| PC(33:0)    | -0.247036566 | 0.078454189 | 0.001735096 |
| AC(11:0)    | 0.243982095  | 0.077773118 | 0.001898014 |
| Trp         | -0.233347809 | 0.07521415  | 0.002127251 |
| Pro         | -0.24644616  | 0.080163593 | 0.002222615 |
| SM(35:1)    | -0.245126055 | 0.080614851 | 0.002481112 |
| Creatinine  | 0.199061107  | 0.066454321 | 0.002998625 |
| PC(40:1)    | -0.241250959 | 0.081099934 | 0.003203659 |
| CE(20:4)    | -0.229356199 | 0.07852112  | 0.003788526 |
| DG(36:2)    | -0.229392421 | 0.078545798 | 0.003794794 |
| Met-SO      | 0.241864062  | 0.082868464 | 0.003816618 |
| PC-O(38:5)  | -0.235289889 | 0.08072382  | 0.003863062 |
| TG(52:2)    | -0.231740677 | 0.079711397 | 0.003954117 |
| SM(33:1)    | -0.222677466 | 0.07766401  | 0.004472329 |
| Spermidine  | -0.175191418 | 0.06157235  | 0.004781585 |
| PC(36:3)    | -0.198825204 | 0.070075598 | 0.004901453 |
| PC(37:1)    | -0.227464857 | 0.081108258 | 0.005231597 |
| PC(33:1)    | -0.215472682 | 0.082071826 | 0.009164899 |
| SM(41:1)    | -0.200362514 | 0.077496627 | 0.01025914  |
| Tyr         | -0.204057306 | 0.080317558 | 0.011634002 |
| LPC(16:0)   | 0.193151508  | 0.076444418 | 0.012095095 |
| PC-O(36:5)  | -0.179727842 | 0.071313054 | 0.012311556 |
| DG(44:3)    | -0.183462289 | 0.076959994 | 0.01783295  |
| LPC(18:1)   | 0.168474813  | 0.072005278 | 0.020039202 |
| Kynurenine  | -0.19365332  | 0.083667378 | 0.021406407 |
| DG(36:3)    | -0.176863841 | 0.07785258  | 0.023908205 |
| SM(43:2)    | -0.167952791 | 0.075172997 | 0.026299397 |
| TG(52:3)    | -0.17867869  | 0.080962278 | 0.027761385 |
| Orn         | -0.173330547 | 0.081181298 | 0.033671397 |
| LPC-O(16:1) | 0.154297815  | 0.07280661  | 0.034991984 |
| CE(18:2)    | -0.143478905 | 0.068020609 | 0.035848511 |
| DG(36:4)    | -0.161034483 | 0.077161331 | 0.037843805 |
| Gln         | -0.164348139 | 0.078858966 | 0.038116773 |
| TG(50:3)    | -0.171722015 | 0.082877691 | 0.038766132 |
| PC(33:4)    | -0.162149027 | 0.078653927 | 0.04022258  |

|            |              |             |             |
|------------|--------------|-------------|-------------|
| TG(48:2)   | -0.165898612 | 0.080886741 | 0.04125266  |
| LPC(18:0)  | 0.145283234  | 0.072740232 | 0.046812864 |
| H1         | -0.16112684  | 0.082930095 | 0.053081454 |
| TG(56:6)   | -0.139373475 | 0.073511833 | 0.059051742 |
| TG(50:2)   | -0.152439972 | 0.080743296 | 0.060119922 |
| LPC(18:2)  | 0.12691274   | 0.068967757 | 0.06685871  |
| Spermine   | -0.133077538 | 0.077488643 | 0.087070763 |
| PC-O(34:2) | -0.1233946   | 0.072457158 | 0.089735529 |
| SM(30:1)   | 0.113529094  | 0.069204093 | 0.102083211 |
| TG(52:4)   | -0.134198326 | 0.081811275 | 0.102114748 |
| AC(4:0)    | -0.127444708 | 0.077926911 | 0.103138978 |
| SM(40:2)   | -0.127397068 | 0.078492353 | 0.105760622 |
| SM(39:1)   | -0.125962176 | 0.078276484 | 0.108760076 |
| SM(34:2)   | -0.121611731 | 0.075841417 | 0.110011076 |
| DG-O(34:1) | -0.123802749 | 0.077591433 | 0.111789505 |
| SM(41:2)   | -0.124826606 | 0.079942289 | 0.119605203 |
| SM(36:1)   | -0.121897188 | 0.079630492 | 0.126440054 |
| SM(38:2)   | -0.121580801 | 0.081418468 | 0.135979128 |
| PC(36:2)   | -0.083148514 | 0.058246033 | 0.154600714 |
| CE(22:5)   | -0.106468308 | 0.075550705 | 0.159939115 |
| SM(42:2)   | -0.105951115 | 0.075615235 | 0.162325272 |
| PC(34:3)   | 0.10124456   | 0.072929783 | 0.166225242 |
| TG(55:8)   | -0.114579147 | 0.082860302 | 0.167885777 |
| SM(32:2)   | -0.111451454 | 0.083514042 | 0.182625516 |
| PC(39:0)   | 0.102247081  | 0.07808041  | 0.191500115 |
| t4-OH-Pro  | -0.091261366 | 0.07236932  | 0.208405075 |
| PC(24:0)   | 0.095815264  | 0.076221717 | 0.209836893 |
| AC(18:2)   | 0.098874028  | 0.078854389 | 0.21045742  |
| Asn        | -0.097215904 | 0.078918806 | 0.21909766  |
| AC(16:0)   | -0.101395421 | 0.08260031  | 0.220182696 |
| CE(16:1)   | -0.097967022 | 0.083744081 | 0.243116002 |
| xLeu       | -0.091124421 | 0.078527928 | 0.246423592 |
| PC(41:3)   | 0.072216142  | 0.064913601 | 0.266930519 |
| Ser        | -0.092550271 | 0.084305532 | 0.273288951 |
| Cer(42:1)  | -0.085564589 | 0.078388858 | 0.276021997 |
| AC(18:1)   | -0.091177771 | 0.084614535 | 0.282206488 |
| ADMA       | 0.083099063  | 0.07765939  | 0.285585209 |
| AC(6:1)    | -0.082942375 | 0.078101274 | 0.289208481 |
| SM(44:2)   | -0.075671132 | 0.07654795  | 0.32378386  |
| SM(38:1)   | -0.079814916 | 0.081095054 | 0.325474988 |
| DG(42:2)   | -0.063903544 | 0.066296151 | 0.335969511 |
| AC(5:0)    | -0.080621959 | 0.08425743  | 0.339509678 |
| CE(18:3)   | -0.07565655  | 0.079618171 | 0.342851115 |
| LPC(16:1)  | 0.075393777  | 0.081578656 | 0.35623083  |
| Cer(43:1)  | -0.071765973 | 0.079328818 | 0.366461733 |
| AC(7:0)    | 0.065911446  | 0.077628623 | 0.396610745 |
| PC-O(36:2) | -0.062230768 | 0.077230906 | 0.421096224 |
| Met        | -0.05984496  | 0.075355268 | 0.427807103 |
| AC(10:0)   | -0.059407243 | 0.079030978 | 0.452579495 |
| Cer(42:2)  | -0.058787841 | 0.079080006 | 0.45789868  |

|            |              |             |             |
|------------|--------------|-------------|-------------|
| PC(32:0)   | -0.050252248 | 0.068374246 | 0.463013124 |
| Ala        | -0.054404184 | 0.075779847 | 0.473435235 |
| AC(14:2)   | 0.051143007  | 0.072569862 | 0.481586728 |
| SM(34:1)   | -0.048800685 | 0.073275952 | 0.505998485 |
| SM(39:2)   | 0.052150647  | 0.081009014 | 0.520282056 |
| CE(22:6)   | -0.044746475 | 0.071253105 | 0.530546986 |
| LPC(15:0)  | -0.046646416 | 0.075272131 | 0.535988343 |
| Asp        | 0.049104795  | 0.079353194 | 0.53657015  |
| AC(0:0)    | 0.051867128  | 0.085650371 | 0.54506996  |
| AC(14:0)   | 0.049599324  | 0.082439381 | 0.547922541 |
| AC(5:1)    | -0.040035503 | 0.067499584 | 0.553605765 |
| LPC(20:1)  | 0.043304541  | 0.073919163 | 0.55848254  |
| Ile        | -0.045539533 | 0.078298385 | 0.561081862 |
| AC(12:1)   | 0.040594532  | 0.071874957 | 0.572689614 |
| AC(8:1)    | -0.047614013 | 0.08472419  | 0.574369843 |
| Val        | -0.043793084 | 0.080895806 | 0.588717588 |
| SM(32:1)   | -0.041155186 | 0.077594578 | 0.596285974 |
| Lys        | -0.039246255 | 0.079594516 | 0.622364604 |
| Thr        | -0.040780012 | 0.08373259  | 0.626447799 |
| PC(32:2)   | 0.036311743  | 0.07809554  | 0.642339642 |
| PC(34:4)   | -0.03387436  | 0.073726121 | 0.646277714 |
| LPC(14:0)  | 0.036205464  | 0.084088993 | 0.666968587 |
| PC(32:1)   | -0.027085567 | 0.067033216 | 0.686492965 |
| Taurine    | -0.031694824 | 0.080571401 | 0.694360254 |
| Gly        | -0.03160095  | 0.080869987 | 0.696286704 |
| SDMA       | 0.024684291  | 0.065578625 | 0.706913297 |
| PC-O(34:1) | -0.023056763 | 0.072611003 | 0.751086321 |
| AC(14:1)   | 0.020531121  | 0.072498645 | 0.777248769 |
| AC(5:0-DC) | -0.020956372 | 0.08002206  | 0.793615542 |
| AC(6:0)    | 0.020634333  | 0.080977207 | 0.799061144 |
| PC-O(34:4) | 0.019503256  | 0.080552054 | 0.808873436 |
| PC(30:0)   | -0.017704602 | 0.077155272 | 0.818683166 |
| AC(3:0)    | -0.016082776 | 0.070221233 | 0.819021985 |
| Phe        | -0.018472641 | 0.080978323 | 0.819645313 |
| Glu        | -0.017560965 | 0.083034625 | 0.83266949  |
| Histamine  | 0.017340047  | 0.08221431  | 0.833117079 |
| AC(12:0)   | -0.012861063 | 0.06859395  | 0.851414714 |
| LPC(17:0)  | 0.013390904  | 0.077130729 | 0.862302215 |
| Cer(40:1)  | 0.012994463  | 0.079603887 | 0.870453939 |
| Arg        | -0.012632645 | 0.078498938 | 0.87227239  |
| PC(29:0)   | 0.010981267  | 0.078756713 | 0.889213736 |
| DG(39:0)   | -0.0097841   | 0.070493772 | 0.889718373 |
| SM(44:1)   | -0.009747451 | 0.0791129   | 0.902034138 |
| PC(34:2)   | 0.006790439  | 0.062288687 | 0.913272231 |
| Cit        | 0.009215488  | 0.08574267  | 0.91445153  |
| AC(13:0)   | 0.008055323  | 0.085745747 | 0.925223941 |
| AC(10:2)   | 0.007013347  | 0.083678128 | 0.933268135 |
| Sarcosine  | 0.001727768  | 0.081444092 | 0.98309072  |
| PC-O(32:0) | -0.000789926 | 0.075199519 | 0.991626719 |
