# Supplementary material for: Integrating genetics with newborn metabolomics in infantile hypertrophic pyloric stenosis
Source: PubMed Central journal article supplement (PMC7794101; doi:10.1007/s11306-020-01763-2), 2021-01-08
Supplement: 11306_2020_1763_MOESM4_ESM.pdf [file 11306_2020_1763_MOESM4_ESM.pdf]

| Metabolites | Beta     | SE       | P        |
|-------------|----------|----------|----------|
| PC(38:4)    | -0.70689 | 0.118532 | 1.28E-08 |
| PC(40:6)    | -0.57156 | 0.095982 | 4.16E-08 |
| PC-O(36:4)  | -0.67959 | 0.12412  | 3.44E-07 |
| PC(38:3)    | -0.5944  | 0.123056 | 5.31E-06 |
| PC-O(40:5)  | -0.53648 | 0.114882 | 9.93E-06 |
| Creatinine  | 0.429274 | 0.093204 | 1.25E-05 |
| PC(36:4)    | -0.58658 | 0.128462 | 1.46E-05 |
| His         | -0.56837 | 0.139255 | 9.25E-05 |
| AC(2:0)     | -0.38544 | 0.097458 | 0.000149 |
| Spermidine  | -0.35846 | 0.093699 | 0.000232 |
| PC-O(36:5)  | -0.45525 | 0.124959 | 0.000434 |
| LPC-O(16:1) | 0.435019 | 0.12084  | 0.000503 |
| PC(36:3)    | -0.41683 | 0.118534 | 0.000553 |
| PC(40:1)    | -0.40315 | 0.117744 | 0.000913 |
| PC(44:1)    | -0.43698 | 0.129671 | 0.00108  |
| AC(11:0)    | 0.496643 | 0.147419 | 0.00125  |
| PC-O(38:5)  | -0.49524 | 0.152227 | 0.00157  |
| TG(44:2)    | -0.35557 | 0.111639 | 0.001952 |
| LPC(16:0)   | 0.376108 | 0.11966  | 0.001955 |
| Trp         | -0.41934 | 0.13646  | 0.002449 |
| LPC-O(18:1) | 0.341193 | 0.113795 | 0.003453 |
| PC(35:1)    | -0.36759 | 0.122697 | 0.003491 |
| DG(34:1)    | -0.37827 | 0.133168 | 0.005488 |
| TG(50:3)    | -0.34397 | 0.129946 | 0.009478 |
| Pro         | -0.37063 | 0.141631 | 0.009628 |
| Tyr         | -0.36476 | 0.142638 | 0.011374 |
| TG(54:5)    | -0.39015 | 0.151631 | 0.011626 |
| PC(33:1)    | -0.38479 | 0.152226 | 0.013172 |
| TG(48:2)    | -0.34557 | 0.137441 | 0.013596 |
| TG(52:3)    | -0.29283 | 0.118504 | 0.015214 |
| CE(18:2)    | -0.23858 | 0.096716 | 0.015395 |
| DG(36:4)    | -0.30657 | 0.125268 | 0.016199 |
| SM(43:1)    | -0.31401 | 0.129844 | 0.016588 |
| PC(36:2)    | -0.23002 | 0.094697 | 0.01699  |
| PC(37:1)    | -0.36034 | 0.152137 | 0.01892  |
| PC(33:0)    | -0.29242 | 0.123853 | 0.020241 |
| DG(36:3)    | -0.28487 | 0.12254  | 0.022258 |
| PC(33:4)    | -0.32197 | 0.140755 | 0.024347 |
| PC-O(34:2)  | -0.28122 | 0.123264 | 0.024711 |
| TG(56:6)    | -0.27584 | 0.126708 | 0.031917 |
| Spermine    | -0.28089 | 0.129035 | 0.031926 |
| PC-O(36:2)  | -0.26916 | 0.1251   | 0.033919 |
| AC(12:1)    | 0.238996 | 0.111181 | 0.034088 |
| H1          | -0.26    | 0.122275 | 0.034835 |
| TG(52:2)    | -0.25473 | 0.120782 | 0.037517 |
| Gln         | -0.27072 | 0.128471 | 0.037675 |
| Ala         | -0.26321 | 0.12564  | 0.038827 |
| Taurine     | -0.2894  | 0.145529 | 0.049613 |
| DG(44:3)    | -0.23567 | 0.120478 | 0.05333  |

|            |          |          |          |
|------------|----------|----------|----------|
| Asn        | -0.23442 | 0.123199 | 0.060031 |
| SM(43:2)   | -0.24649 | 0.129776 | 0.060561 |
| DG(42:2)   | -0.17573 | 0.094416 | 0.065807 |
| DG(36:2)   | -0.2392  | 0.128571 | 0.065852 |
| Orn        | -0.26541 | 0.148264 | 0.076603 |
| SM(33:1)   | -0.24491 | 0.137772 | 0.077148 |
| LPC(18:1)  | 0.214001 | 0.125689 | 0.090364 |
| Met        | -0.20673 | 0.12523  | 0.102019 |
| Met-SO     | 0.210259 | 0.129359 | 0.105831 |
| PC-O(34:1) | -0.19776 | 0.121524 | 0.106938 |
| SM(32:2)   | -0.24557 | 0.153793 | 0.113572 |
| SM(42:2)   | -0.20526 | 0.128924 | 0.114612 |
| t4-OH-Pro  | -0.1959  | 0.12374  | 0.116715 |
| CE(22:5)   | -0.21155 | 0.13455  | 0.119195 |
| CE(20:4)   | -0.20201 | 0.130885 | 0.12599  |
| AC(16:0)   | -0.17232 | 0.113304 | 0.131546 |
| TG(50:2)   | -0.17514 | 0.120625 | 0.148265 |
| xLeu       | -0.19837 | 0.139564 | 0.156954 |
| SM(44:2)   | -0.16424 | 0.116328 | 0.161206 |
| AC(5:0)    | -0.18243 | 0.133623 | 0.173865 |
| TG(55:8)   | -0.18221 | 0.133227 | 0.174638 |
| TG(52:4)   | -0.18134 | 0.134673 | 0.181308 |
| PC(34:2)   | -0.12769 | 0.096313 | 0.188039 |
| AC(8:1)    | -0.18324 | 0.138435 | 0.188726 |
| LPC(18:0)  | 0.150641 | 0.116191 | 0.197877 |
| PC(24:0)   | 0.165137 | 0.130431 | 0.208514 |
| AC(3:0)    | -0.1407  | 0.111498 | 0.210064 |
| DG-O(34:1) | -0.16817 | 0.133991 | 0.212616 |
| AC(12:0)   | 0.121599 | 0.097958 | 0.217497 |
| Cer(42:2)  | -0.16002 | 0.128915 | 0.217498 |
| SM(40:2)   | -0.15169 | 0.124044 | 0.222968 |
| SM(35:1)   | -0.15923 | 0.130746 | 0.224872 |
| PC(41:3)   | -0.14666 | 0.12216  | 0.232885 |
| LPC(18:2)  | 0.158788 | 0.134028 | 0.239013 |
| AC(10:0)   | 0.153175 | 0.130025 | 0.2417   |
| SM(38:2)   | -0.14642 | 0.129003 | 0.257871 |
| SM(41:1)   | -0.14156 | 0.124623 | 0.25881  |
| LPC(16:1)  | 0.151288 | 0.13612  | 0.267865 |
| CE(16:1)   | -0.14401 | 0.129931 | 0.269197 |
| Kynurenine | -0.15933 | 0.145108 | 0.273652 |
| PC-O(32:0) | -0.12957 | 0.121535 | 0.289008 |
| Cer(42:1)  | -0.14412 | 0.137886 | 0.298522 |
| ADMA       | -0.14045 | 0.135061 | 0.30109  |
| SM(32:1)   | -0.13516 | 0.131668 | 0.307202 |
| Phe        | -0.14379 | 0.14087  | 0.308762 |
| CE(18:3)   | -0.13275 | 0.131612 | 0.315654 |
| Glu        | -0.14464 | 0.145586 | 0.321797 |
| AC(14:1)   | 0.102407 | 0.103948 | 0.326991 |
| LPC(20:1)  | -0.12482 | 0.126823 | 0.327458 |
| Lys        | -0.1353  | 0.138478 | 0.32984  |

|            |          |          |          |
|------------|----------|----------|----------|
| LPC(17:0)  | 0.146272 | 0.150061 | 0.330993 |
| AC(18:1)   | -0.14073 | 0.145267 | 0.335094 |
| Asp        | -0.12517 | 0.131336 | 0.342928 |
| SM(34:2)   | -0.11479 | 0.128517 | 0.373969 |
| SM(39:2)   | 0.138355 | 0.160177 | 0.389868 |
| SM(41:2)   | -0.11939 | 0.139004 | 0.391532 |
| PC-O(34:4) | 0.109156 | 0.130268 | 0.404125 |
| SM(39:1)   | -0.11129 | 0.136125 | 0.415635 |
| Cer(43:1)  | 0.096195 | 0.118195 | 0.417727 |
| CE(22:6)   | -0.08553 | 0.113382 | 0.452475 |
| SM(34:1)   | -0.08397 | 0.112676 | 0.457934 |
| Sarcosine  | -0.10162 | 0.140354 | 0.469997 |
| PC(29:0)   | 0.08975  | 0.12538  | 0.47583  |
| SM(44:1)   | -0.08767 | 0.127156 | 0.492175 |
| PC(34:4)   | -0.07738 | 0.113577 | 0.4973   |
| Ile        | -0.09319 | 0.13809  | 0.501446 |
| Thr        | -0.10224 | 0.152256 | 0.503479 |
| Histamine  | -0.08481 | 0.132374 | 0.522533 |
| SM(30:1)   | 0.07774  | 0.125377 | 0.536686 |
| PC(39:0)   | 0.067471 | 0.116485 | 0.563817 |
| Ser        | -0.08892 | 0.155883 | 0.569706 |
| PC(32:2)   | -0.07848 | 0.149073 | 0.599817 |
| PC(32:1)   | 0.058891 | 0.113024 | 0.603527 |
| AC(14:0)   | -0.07196 | 0.144107 | 0.618675 |
| DG(39:0)   | 0.054018 | 0.120338 | 0.654521 |
| AC(18:2)   | -0.05272 | 0.134146 | 0.694789 |
| Gly        | -0.05003 | 0.147155 | 0.734589 |
| AC(6:1)    | -0.04089 | 0.134485 | 0.761756 |
| AC(6:0)    | -0.03642 | 0.126126 | 0.773404 |
| LPC(15:0)  | -0.03903 | 0.14337  | 0.786029 |
| AC(13:0)   | 0.037171 | 0.140328 | 0.791663 |
| AC(0:0)    | -0.0359  | 0.13723  | 0.794182 |
| AC(7:0)    | -0.03562 | 0.146651 | 0.808613 |
| Cit        | 0.03349  | 0.143678 | 0.815959 |
| Cer(40:1)  | -0.02755 | 0.131091 | 0.833979 |
| Arg        | 0.027724 | 0.140495 | 0.843982 |
| LPC(14:0)  | 0.030324 | 0.154259 | 0.844379 |
| AC(14:2)   | 0.017967 | 0.100181 | 0.858049 |
| SM(38:1)   | -0.02309 | 0.131876 | 0.861196 |
| PC(34:3)   | 0.017716 | 0.127014 | 0.889364 |
| PC(32:0)   | 0.014773 | 0.114304 | 0.89731  |
| AC(5:1)    | -0.0161  | 0.127732 | 0.899972 |
| SM(36:1)   | -0.01567 | 0.12654  | 0.901555 |
| Val        | -0.01345 | 0.139504 | 0.923409 |
| AC(5:0-DC) | 0.011847 | 0.142362 | 0.933854 |
| AC(4:0)    | 0.008561 | 0.119036 | 0.942813 |
| PC(30:0)   | 0.005886 | 0.137623 | 0.965975 |
| AC(10:2)   | -0.00393 | 0.150518 | 0.979241 |
| SDMA       | 0.001795 | 0.104545 | 0.98634  |
