# Supplementary material for: Integrating genetics with newborn metabolomics in infantile hypertrophic pyloric stenosis
Source: PubMed Central journal article supplement (PMC7794101; doi:10.1007/s11306-020-01763-2), 2021-01-08
Supplement: 11306_2020_1763_MOESM5_ESM.pdf [file 11306_2020_1763_MOESM5_ESM.pdf]

| Metabolites | Beta     | SE       | P        |
|-------------|----------|----------|----------|
| PC(44:1)    | -0.28248 | 0.096682 | 0.00395  |
| SM(35:1)    | -0.28817 | 0.104072 | 0.005873 |
| PC(38:4)    | -0.24929 | 0.094843 | 0.009353 |
| SM(43:1)    | -0.24832 | 0.094882 | 0.009646 |
| TG(54:5)    | -0.24112 | 0.097079 | 0.013955 |
| PC(36:4)    | -0.22747 | 0.092722 | 0.015142 |
| SM(41:1)    | -0.24524 | 0.100998 | 0.016206 |
| PC(41:3)    | 0.17753  | 0.074017 | 0.017816 |
| His         | -0.21978 | 0.094811 | 0.02165  |
| SM(33:1)    | -0.21676 | 0.094929 | 0.023616 |
| DG(36:2)    | -0.22611 | 0.101809 | 0.027647 |
| CE(20:4)    | -0.22035 | 0.100451 | 0.029588 |
| PC(33:0)    | -0.22018 | 0.102122 | 0.031553 |
| Met-SO      | 0.223155 | 0.106012 | 0.036727 |
| TG(52:2)    | -0.22328 | 0.106802 | 0.038033 |
| PC(35:1)    | -0.17442 | 0.084821 | 0.041257 |
| LPC-O(18:1) | 0.182452 | 0.088953 | 0.04178  |
| TG(44:2)    | -0.20761 | 0.10135  | 0.042066 |
| Kynurenine  | -0.20294 | 0.101485 | 0.047149 |
| ADMA        | 0.183898 | 0.096004 | 0.057055 |
| DG(34:1)    | -0.18793 | 0.100085 | 0.062096 |
| AC(2:0)     | -0.16692 | 0.089982 | 0.06417  |
| AC(10:0)    | -0.18403 | 0.100201 | 0.066824 |
| Cer(43:1)   | -0.19125 | 0.104405 | 0.068715 |
| AC(4:0)     | -0.18414 | 0.103946 | 0.078683 |
| AC(18:2)    | 0.172473 | 0.097757 | 0.079538 |
| Pro         | -0.16873 | 0.096137 | 0.081007 |
| SM(36:1)    | -0.17302 | 0.103267 | 0.09429  |
| PC-O(36:4)  | -0.13476 | 0.083807 | 0.109643 |
| AC(7:0)     | 0.145746 | 0.090815 | 0.111443 |
| SM(39:1)    | -0.15322 | 0.097181 | 0.116745 |
| PC(37:1)    | -0.14739 | 0.095382 | 0.123834 |
| LPC(20:1)   | 0.141303 | 0.092482 | 0.128346 |
| TG(50:2)    | -0.16324 | 0.108028 | 0.13389  |
| PC(38:3)    | -0.15502 | 0.102998 | 0.134106 |
| PC(40:1)    | -0.16626 | 0.110479 | 0.134186 |
| Asp         | 0.151654 | 0.101306 | 0.135246 |
| Taurine     | 0.141133 | 0.095508 | 0.141335 |
| Orn         | -0.14274 | 0.097178 | 0.143665 |
| Trp         | -0.13064 | 0.089224 | 0.144911 |
| SM(30:1)    | 0.122092 | 0.084343 | 0.149556 |
| PC(39:0)    | 0.149735 | 0.105375 | 0.157165 |
| DG(44:3)    | -0.14349 | 0.101698 | 0.160056 |
| PC(33:1)    | -0.1344  | 0.09623  | 0.164279 |
| PC(34:3)    | 0.126003 | 0.090658 | 0.166334 |
| LPC(18:1)   | 0.122382 | 0.088529 | 0.168649 |
| DG(36:4)    | -0.13024 | 0.09772  | 0.184349 |
| SM(41:2)    | -0.13137 | 0.098595 | 0.184435 |
| Tyr         | -0.12684 | 0.097026 | 0.192825 |

|            |          |          |          |
|------------|----------|----------|----------|
| DG(36:3)   | -0.13099 | 0.102433 | 0.202773 |
| TG(52:4)   | -0.13193 | 0.104376 | 0.207918 |
| SM(43:2)   | -0.11803 | 0.094414 | 0.213061 |
| LPC(18:2)  | 0.097718 | 0.078677 | 0.216046 |
| LPC(18:0)  | 0.115756 | 0.093371 | 0.216737 |
| SM(34:2)   | -0.1158  | 0.096441 | 0.231451 |
| TG(52:3)   | -0.12758 | 0.108125 | 0.238485 |
| Ser        | -0.11747 | 0.10005  | 0.240756 |
| PC-O(32:0) | 0.113149 | 0.096475 | 0.242457 |
| SM(40:2)   | -0.11723 | 0.100044 | 0.242869 |
| PC(32:1)   | -0.09279 | 0.085096 | 0.277134 |
| AC(12:0)   | -0.1019  | 0.093936 | 0.279541 |
| CE(18:2)   | -0.09767 | 0.093347 | 0.296848 |
| AC(6:1)    | -0.0987  | 0.098364 | 0.317013 |
| AC(5:1)    | -0.07865 | 0.078562 | 0.31815  |
| AC(0:0)    | 0.110102 | 0.110963 | 0.321325 |
| TG(55:8)   | -0.10468 | 0.105347 | 0.325492 |
| SM(38:1)   | -0.1014  | 0.103551 | 0.327479 |
| PC(36:3)   | -0.08549 | 0.08745  | 0.329751 |
| Spermidine | -0.07997 | 0.082061 | 0.331141 |
| PC(32:0)   | -0.08246 | 0.084883 | 0.332693 |
| AC(16:0)   | -0.10605 | 0.111558 | 0.341849 |
| PC-O(40:5) | -0.08761 | 0.093326 | 0.349176 |
| AC(14:0)   | 0.09471  | 0.10154  | 0.352254 |
| PC-O(34:1) | 0.086018 | 0.092225 | 0.352294 |
| AC(12:1)   | -0.08303 | 0.094423 | 0.380623 |
| Val        | -0.08786 | 0.100084 | 0.381717 |
| Histamine  | 0.092144 | 0.106957 | 0.390125 |
| Gln        | -0.08688 | 0.102351 | 0.397208 |
| DG-O(34:1) | -0.08183 | 0.097818 | 0.404098 |
| SM(38:2)   | -0.08513 | 0.106085 | 0.423374 |
| LPC(15:0)  | -0.06927 | 0.087786 | 0.431145 |
| PC-O(38:5) | -0.07276 | 0.092862 | 0.434447 |
| TG(48:2)   | -0.07864 | 0.101339 | 0.438813 |
| PC(32:2)   | 0.068972 | 0.090098 | 0.444979 |
| AC(11:0)   | 0.067012 | 0.088533 | 0.450113 |
| TG(50:3)   | -0.08218 | 0.108942 | 0.450596 |
| LPC(16:0)  | 0.066781 | 0.095879 | 0.487038 |
| Cer(42:1)  | -0.06706 | 0.096311 | 0.487196 |
| H1         | -0.0767  | 0.111262 | 0.491487 |
| PC(33:4)   | -0.06553 | 0.095714 | 0.494481 |
| CE(16:1)   | -0.07424 | 0.109027 | 0.4968   |
| TG(56:6)   | -0.06078 | 0.09181  | 0.508842 |
| LPC(17:0)  | -0.05708 | 0.087008 | 0.512631 |
| Spermine   | -0.06034 | 0.098956 | 0.542801 |
| DG(39:0)   | -0.0519  | 0.088728 | 0.55933  |
| Gly        | -0.05448 | 0.093565 | 0.560224 |
| PC(34:2)   | 0.046976 | 0.081326 | 0.564254 |
| SM(42:2)   | -0.05361 | 0.095333 | 0.574576 |
| AC(6:0)    | 0.058711 | 0.105283 | 0.576894 |

|             |          |          |          |
|-------------|----------|----------|----------|
| Ala         | 0.050805 | 0.095283 | 0.594536 |
| PC(40:6)    | -0.0459  | 0.090066 | 0.611012 |
| AC(18:1)    | -0.05201 | 0.103152 | 0.613914 |
| Cit         | -0.0545  | 0.108613 | 0.615631 |
| Creatinine  | 0.045127 | 0.089651 | 0.616131 |
| AC(13:0)    | 0.054906 | 0.109942 | 0.61812  |
| t4-OH-Pro   | -0.04352 | 0.088502 | 0.622831 |
| PC(30:0)    | -0.04644 | 0.094486 | 0.623666 |
| PC(29:0)    | -0.04897 | 0.10129  | 0.629259 |
| PC-O(34:2)  | -0.04311 | 0.091094 | 0.6366   |
| AC(14:2)    | 0.047767 | 0.100912 | 0.636711 |
| AC(5:0-DC)  | -0.04586 | 0.098567 | 0.642285 |
| PC-O(36:2)  | 0.042626 | 0.0998   | 0.669835 |
| SM(44:2)    | -0.04106 | 0.102501 | 0.689174 |
| SM(32:2)    | -0.03731 | 0.09779  | 0.702808 |
| xLeu        | -0.03631 | 0.096223 | 0.706542 |
| Asn         | -0.03891 | 0.10356  | 0.707602 |
| AC(3:0)     | 0.033321 | 0.092078 | 0.717872 |
| Glu         | 0.03477  | 0.101969 | 0.733497 |
| AC(5:0)     | -0.03689 | 0.109563 | 0.736741 |
| PC(24:0)    | 0.031271 | 0.094461 | 0.741015 |
| CE(22:5)    | -0.03018 | 0.092061 | 0.743403 |
| LPC-O(16:1) | -0.02803 | 0.090191 | 0.756316 |
| Sarcosine   | 0.031043 | 0.101225 | 0.759546 |
| Ile         | -0.02734 | 0.096555 | 0.777251 |
| SM(34:1)    | -0.02726 | 0.097605 | 0.780341 |
| AC(8:1)     | 0.027616 | 0.108128 | 0.798557 |
| PC-O(36:5)  | -0.02188 | 0.086369 | 0.800263 |
| Phe         | 0.024472 | 0.100346 | 0.807245 |
| DG(42:2)    | -0.02195 | 0.090686 | 0.809116 |
| SDMA        | 0.018549 | 0.08615  | 0.829824 |
| SM(32:1)    | -0.0206  | 0.096878 | 0.83184  |
| LPC(14:0)   | 0.020296 | 0.101123 | 0.840814 |
| CE(18:3)    | -0.01906 | 0.101953 | 0.851938 |
| AC(14:1)    | -0.01796 | 0.099502 | 0.857017 |
| SM(39:2)    | -0.01643 | 0.091219 | 0.85725  |
| Lys         | -0.01669 | 0.096038 | 0.862257 |
| Arg         | -0.01664 | 0.096215 | 0.862865 |
| PC(36:2)    | -0.01283 | 0.075171 | 0.864633 |
| PC(34:4)    | -0.01646 | 0.098554 | 0.867566 |
| PC-O(34:4)  | -0.01645 | 0.104421 | 0.874997 |
| Thr         | -0.01324 | 0.100544 | 0.895214 |
| SM(44:1)    | 0.011719 | 0.102962 | 0.909512 |
| LPC(16:1)   | 0.010999 | 0.1019   | 0.914164 |
| AC(10:2)    | -0.00981 | 0.101649 | 0.923233 |
| Cer(40:1)   | 0.009074 | 0.101415 | 0.928799 |
| Met         | 0.008122 | 0.09451  | 0.931617 |
| Cer(42:2)   | -0.00286 | 0.102748 | 0.977804 |
| CE(22:6)    | 0.000777 | 0.093703 | 0.993394 |
