# Supplementary material for: Integrating genetics with newborn metabolomics in infantile hypertrophic pyloric stenosis
Source: PubMed Central journal article supplement (PMC7794101; doi:10.1007/s11306-020-01763-2), 2021-01-08
Supplement: 11306_2020_1763_MOESM6_ESM.pdf [file 11306_2020_1763_MOESM6_ESM.pdf]

|                    | PC(38:4) |      |          | PC(36:4) |      |          | PC-O(36:4) |      |          | PC(44:1) |      |          | Histidine |      |          | PC(38:3) |      |          | AC(2:0) |      |          |
|--------------------|----------|------|----------|----------|------|----------|------------|------|----------|----------|------|----------|-----------|------|----------|----------|------|----------|---------|------|----------|
|                    | BETA     | SE   | P        | BETA     | SE   | P        | BETA       | SE   | P        | BETA     | SE   | P        | BETA      | SE   | P        | BETA     | SE   | P        | BETA    | SE   | P        |
| <b>Intercept</b>   | -1.20    | 1.03 | 2.43E-01 | -0.71    | 1.04 | 4.97E-01 | 3.52       | 1.02 | 6.18E-04 | -6.92    | 1.05 | 1.23E-10 | -5.21     | 1.07 | 1.64E-06 | -0.22    | 1.13 | 8.49E-01 | -3.86   | 0.94 | 4.56E-05 |
| <b>IHPS (case)</b> | -0.42    | 0.07 | 5.55E-08 | -0.36    | 0.07 | 2.96E-06 | -0.34      | 0.07 | 3.22E-06 | -0.32    | 0.08 | 3.33E-05 | -0.34     | 0.08 | 2.78E-05 | -0.32    | 0.08 | 8.01E-05 | -0.26   | 0.07 | 1.72E-04 |
| <b>YOB (1998)</b>  | -0.32    | 0.37 | 3.88E-01 | -0.07    | 0.38 | 8.62E-01 | -0.60      | 0.39 | 1.30E-01 | -0.19    | 0.38 | 6.21E-01 | -0.31     | 0.38 | 4.13E-01 | -0.52    | 0.43 | 2.25E-01 | -0.10   | 0.34 | 7.66E-01 |
| <b>YOB (1999)</b>  | -0.56    | 0.35 | 1.16E-01 | -0.47    | 0.36 | 1.92E-01 | -1.04      | 0.37 | 5.56E-03 | -0.29    | 0.36 | 4.17E-01 | 0.52      | 0.36 | 1.56E-01 | 0.10     | 0.40 | 8.14E-01 | -0.23   | 0.32 | 4.70E-01 |
| <b>YOB (2000)</b>  | -0.72    | 0.40 | 7.21E-02 | -0.60    | 0.41 | 1.42E-01 | -0.64      | 0.42 | 1.30E-01 | -1.02    | 0.41 | 1.32E-02 | -0.60     | 0.41 | 1.41E-01 | -0.49    | 0.46 | 2.85E-01 | -0.03   | 0.36 | 9.37E-01 |
| <b>YOB (2001)</b>  | -0.17    | 0.32 | 5.98E-01 | 0.18     | 0.33 | 5.73E-01 | 0.15       | 0.34 | 6.55E-01 | 0.21     | 0.33 | 5.19E-01 | 0.73      | 0.33 | 2.65E-02 | -0.20    | 0.37 | 5.84E-01 | 0.49    | 0.29 | 9.20E-02 |
| <b>YOB (2002)</b>  | 0.41     | 0.31 | 1.92E-01 | 0.52     | 0.32 | 1.05E-01 | 0.54       | 0.33 | 1.02E-01 | 0.30     | 0.32 | 3.53E-01 | 1.26      | 0.32 | 1.02E-04 | 0.49     | 0.36 | 1.72E-01 | 0.10    | 0.28 | 7.24E-01 |
| <b>YOB (2003)</b>  | 0.25     | 0.37 | 4.95E-01 | 0.32     | 0.38 | 3.97E-01 | 0.83       | 0.39 | 3.48E-02 | -0.18    | 0.38 | 6.39E-01 | 0.93      | 0.38 | 1.50E-02 | 0.07     | 0.43 | 8.77E-01 | -0.05   | 0.34 | 8.90E-01 |
| <b>YOB (2004)</b>  | 0.91     | 0.31 | 3.63E-03 | 0.73     | 0.32 | 2.23E-02 | 0.73       | 0.33 | 2.76E-02 | 0.43     | 0.32 | 1.75E-01 | 1.33      | 0.32 | 4.16E-05 | 0.69     | 0.36 | 5.51E-02 | 0.09    | 0.28 | 7.44E-01 |
| <b>YOB (2005)</b>  | 0.66     | 0.33 | 5.11E-02 | 0.58     | 0.34 | 9.22E-02 | 0.51       | 0.35 | 1.49E-01 | -0.30    | 0.34 | 3.76E-01 | 0.85      | 0.34 | 1.42E-02 | 0.39     | 0.38 | 3.13E-01 | -0.23   | 0.30 | 4.41E-01 |
| <b>YOB (2006)</b>  | 0.34     | 0.29 | 2.50E-01 | 0.26     | 0.30 | 3.86E-01 | 0.43       | 0.31 | 1.57E-01 | 0.23     | 0.30 | 4.31E-01 | 1.12      | 0.30 | 2.05E-04 | 0.52     | 0.33 | 1.23E-01 | -0.02   | 0.26 | 9.30E-01 |
| <b>YOB (2007)</b>  | 0.13     | 0.34 | 7.00E-01 | 0.43     | 0.35 | 2.17E-01 | 0.47       | 0.36 | 1.94E-01 | -0.06    | 0.35 | 8.57E-01 | 1.12      | 0.35 | 1.43E-03 | -0.05    | 0.39 | 9.04E-01 | -0.12   | 0.31 | 7.05E-01 |
| <b>YOB (2008)</b>  | 0.62     | 0.30 | 4.11E-02 | 0.44     | 0.31 | 1.61E-01 | 0.48       | 0.32 | 1.34E-01 | 0.26     | 0.31 | 3.98E-01 | 1.37      | 0.31 | 1.66E-05 | 0.39     | 0.35 | 2.64E-01 | 0.08    | 0.27 | 7.82E-01 |
| <b>YOB (2009)</b>  | 0.92     | 0.27 | 7.17E-04 | 1.03     | 0.27 | 2.06E-04 | -0.01      | 0.28 | 9.78E-01 | 0.23     | 0.27 | 4.06E-01 | 0.81      | 0.27 | 3.37E-03 | 0.05     | 0.31 | 8.68E-01 | 0.96    | 0.24 | 1.00E-04 |
| <b>YOB (2010)</b>  | 0.55     | 0.26 | 3.79E-02 | 0.64     | 0.27 | 1.82E-02 | -0.39      | 0.28 | 1.61E-01 | 0.32     | 0.27 | 2.32E-01 | 0.80      | 0.27 | 3.62E-03 | -0.11    | 0.30 | 7.15E-01 | 1.06    | 0.24 | 1.39E-05 |
| <b>YOB (2011)</b>  | 1.29     | 0.28 | 4.62E-06 | 1.33     | 0.28 | 3.61E-06 | 0.31       | 0.29 | 2.78E-01 | 0.70     | 0.28 | 1.31E-02 | 1.29      | 0.28 | 7.26E-06 | 0.26     | 0.32 | 4.07E-01 | 1.43    | 0.25 | 2.84E-08 |
| <b>YOB (2012)</b>  | 1.13     | 0.27 | 4.55E-05 | 1.19     | 0.28 | 2.98E-05 | -0.22      | 0.29 | 4.49E-01 | 0.46     | 0.28 | 1.00E-01 | 1.03      | 0.28 | 2.92E-04 | 0.10     | 0.31 | 7.39E-01 | 1.47    | 0.25 | 9.60E-09 |
| <b>YOB (2013)</b>  | 0.68     | 0.28 | 1.60E-02 | 0.74     | 0.29 | 1.01E-02 | -0.51      | 0.29 | 8.68E-02 | 0.28     | 0.29 | 3.32E-01 | 1.08      | 0.29 | 2.04E-04 | -0.24    | 0.32 | 4.50E-01 | 1.22    | 0.25 | 2.39E-06 |
| <b>YOB (2014)</b>  | 0.75     | 0.27 | 5.46E-03 | 0.74     | 0.27 | 6.88E-03 | -0.59      | 0.28 | 3.59E-02 | 0.18     | 0.27 | 5.12E-01 | 1.01      | 0.27 | 2.94E-04 | -0.12    | 0.31 | 7.00E-01 | 1.15    | 0.24 | 3.36E-06 |
| <b>sex (male)</b>  | 0.06     | 0.12 | 5.94E-01 | 0.07     | 0.12 | 5.63E-01 | 0.34       | 0.13 | 6.92E-03 | 0.30     | 0.12 | 1.61E-02 | 0.15      | 0.12 | 2.38E-01 | 0.22     | 0.14 | 1.10E-01 | -0.06   | 0.11 | 5.67E-01 |
| <b>c-section</b>   | -0.05    | 0.10 | 6.17E-01 | -0.08    | 0.10 | 4.16E-01 | 0.04       | 0.10 | 6.88E-01 | -0.32    | 0.10 | 1.97E-03 | -0.14     | 0.10 | 1.91E-01 | -0.02    | 0.11 | 8.86E-01 | 0.20    | 0.09 | 2.68E-02 |
| <b>GA</b>          | 0.02     | 0.02 | 3.09E-01 | 0.01     | 0.02 | 6.10E-01 | -0.08      | 0.02 | 1.40E-03 | 0.18     | 0.03 | 3.18E-12 | 0.11      | 0.03 | 2.58E-05 | 0.01     | 0.03 | 7.04E-01 | 0.08    | 0.02 | 2.67E-04 |
| <b>Parity</b>      | -0.13    | 0.04 | 4.60E-03 | -0.17    | 0.05 | 1.40E-04 | -0.14      | 0.04 | 1.57E-03 | -0.16    | 0.05 | 5.04E-04 | 0.07      | 0.05 | 1.27E-01 | -0.08    | 0.05 | 1.22E-01 | -0.04   | 0.04 | 3.07E-01 |
